1 **CD4<sup>+</sup> T cells persist for years in the human small intestine**  
2 **and mediate robust T<sub>H</sub>1 immunity**  
3

4 Raquel Bartolomé Casado<sup>1\*</sup>, Ole J.B. Landsverk<sup>1</sup>, Sudhir Kumar Chauhan<sup>1,2</sup>, Frank Sætre<sup>1</sup>,  
5 Kjersti Thorvaldsen Hagen<sup>1</sup>, Sheraz Yaqub<sup>3</sup>, Ole Øyen<sup>4</sup>, Rune Horneland<sup>4</sup>, Einar Martin  
6 Aandahl<sup>2,4</sup>, Lars Aabakken<sup>5</sup>, Espen S. Bækkevold<sup>1</sup>, Frode L. Jahnsen<sup>1\*</sup>

7  
8  
9 <sup>1</sup>*Department of Pathology, Oslo University Hospital and University of Oslo, Oslo, Norway.*

10 <sup>2</sup>*Department of Cancer Immunology, Institute for Cancer Research, Oslo University Hospital,*  
11 *Oslo, Norway*

12 <sup>3</sup>*Department of Gastrointestinal Surgery, Oslo University Hospital, Rikshospitalet, Oslo,*  
13 *Norway*

14 <sup>4</sup>*Department of Transplantation Medicine, Section for Transplant Surgery, Oslo University*  
15 *Hospital, Rikshospitalet, Oslo, Norway.*

16 <sup>5</sup>*Department of Gastroenterology, Oslo University Hospital - Rikshospitalet, Oslo, Norway*

17 \* Correspondence: [r.b.casado@medisin.uio.no](mailto:r.b.casado@medisin.uio.no) ; [f.l.jahnsen@medisin.uio.no](mailto:f.l.jahnsen@medisin.uio.no)  
18  
19  
20

21 **Abbreviations:**

22 IE, intraepithelial

23 LP, lamina propria

24 RPMI, Roswell Park Memorial Institute medium

25 SI, small intestine

26 T<sub>RM</sub>, resident memory T cell

27 Tx, pancreatic-duodenal transplantation (of diabetes mellitus patients)  
28

29  
30  
31 **Keywords:** Tissue-resident lymphocytes; CD4<sup>+</sup> T cells; memory T cells; human small intestine;  
32 longevity; transplantation  
33  
34  
35  
36

37 **Abstract:**

38 Studies in mice and humans have shown that CD8<sup>+</sup> T cell immunosurveillance in non-  
39 lymphoid tissues is dominated by resident populations. Whether CD4<sup>+</sup> T cells use the same  
40 strategies to survey peripheral tissues is less clear. Here, examining the turnover of CD4<sup>+</sup> T  
41 cells in transplanted duodenum in humans, we demonstrate that the majority of CD4<sup>+</sup> T cells  
42 were still donor-derived one year after transplantation. In contrast to memory CD4<sup>+</sup> T cells in  
43 peripheral blood, intestinal CD4<sup>+</sup> T<sub>RM</sub> cells expressed CD69 and CD161, but only a minor  
44 fraction expressed CD103. Functionally, intestinal CD4<sup>+</sup> T<sub>RM</sub> cells were very potent cytokine  
45 producers; the vast majority being polyfunctional T<sub>H</sub>1 cells, whereas a minor fraction  
46 produced IL-17. Interestingly, a fraction of intestinal CD4<sup>+</sup> T cells produced granzyme-B and  
47 perforin after activation. Together, we show that the intestinal CD4<sup>+</sup> T-cell compartment is  
48 dominated by resident populations that survive for more than 1 year. This finding is of high  
49 relevance for the development of oral vaccines and therapies for diseases in the gut.

50

51

52 **Introduction**

53 Studies of mouse models of infection have shown that CD8<sup>+</sup> T cells remain in peripheral  
54 tissues long after pathogen clearance (Masopust et al., 2001). These long-lived CD8<sup>+</sup> T cells  
55 have limited potential to recirculate and have been termed resident memory T (T<sub>RM</sub>) cells  
56 (Masopust and Soerens, 2019; Mueller and Mackay, 2016; Szabo et al., 2019). Moreover,  
57 CD8<sup>+</sup> T<sub>RM</sub> cells show an extraordinary ability to mount rapid and potent *in situ* responses  
58 after infectious re-exposure (Beura et al., 2018; Park et al., 2018; Schenkel et al., 2013). The  
59 currently most established markers to identify CD8<sup>+</sup> T<sub>RM</sub> cells in barrier tissues are CD69 and  
60 CD103 (Bartolome-Casado et al., 2019; Mackay et al., 2013; Snyder et al., 2019). CD69 is  
61 rapidly upregulated after arrival into the tissue (Klonowski et al., 2004), and plays a key role  
62 preventing tissue egress by antagonizing sphingosine 1-phosphate receptor (S1PR1) (Skon et  
63 al., 2013). CD103 (also known as  $\alpha_E$  integrin) is highly expressed on intraepithelial  
64 lymphocytes (IELs) and the heterodimer  $\alpha_E\beta_7$  binds E-cadherin on the surface of epithelial  
65 cells (Cepek et al., 1994; Schon et al., 1999), promoting the accumulation of IELs in the  
66 epithelium.

67           Although CD4<sup>+</sup>T cells are more abundant than CD8<sup>+</sup>T cells in most peripheral tissues  
68 (Sathaliyawala et al., 2013), studies to understand T<sub>RM</sub> cell biology have mainly focused on  
69 CD8<sup>+</sup>T cells. Over the last decade, CD4<sup>+</sup>T<sub>RM</sub> cells have been identified in lungs (Hondowicz et  
70 al., 2016; Teijaro et al., 2011), skin (Glennie et al., 2015; Watanabe et al., 2015) and the  
71 reproductive tract (Iijima and Iwasaki, 2014). However, the CD4<sup>+</sup>T<sub>RM</sub> population seems to be  
72 more heterogeneous and functionally plastic compared to CD8<sup>+</sup>T<sub>RM</sub> cells (Becattini et al.,  
73 2015; Brucklacher-Waldert et al., 2014), and whether CD4<sup>+</sup>T cells in peripheral tissues are  
74 truly resident, non-circulatory cells is still a matter of debate (Carbone and Gebhardt, 2019).

75           CD103 as well as CD69 are induced by TGF-β, which is constitutively produced by gut  
76 epithelial cells (Zhang and Bevan, 2013). At human mucosal sites, most CD4<sup>+</sup>T cells express  
77 CD69, but few express CD103 compared to CD8<sup>+</sup>T<sub>RM</sub> cells (Sathaliyawala et al., 2013), and  
78 both CD103<sup>-</sup> and CD103<sup>+</sup>CD4<sup>+</sup>T subsets have been described in different tissues, such as  
79 lung (Oja et al., 2018; Snyder et al., 2019) and skin (Watanabe et al., 2015). Intestinal CD4<sup>+</sup>  
80 T<sub>RM</sub> cells have shown to play a critical role in protection against different pathogens,  
81 including *C. rodentium* (Bishu et al., 2019) and *Listeria* (Romagnoli et al., 2017) in mouse  
82 models. Although our knowledge about the role of intestinal CD4<sup>+</sup>T-cell effector subsets in  
83 the pathogenesis of inflammatory bowel disease (IBD) (Kleinschek et al., 2009; Lamb et al.,  
84 2017; Zundler et al., 2019) and coeliac disease (Christophersen et al., 2019; Risnes et al.,  
85 2018) have substantially progressed over the last decade, our current understanding of CD4<sup>+</sup>  
86 T-cell immunosurveillance and long-term persistence in the human intestine remains  
87 incomplete.

88           We have recently reported that the majority of CD8<sup>+</sup>T cells persists for years in  
89 human small intestine (Bartolome-Casado et al., 2019), however, it is still unknown whether  
90 CD4<sup>+</sup>T cells share these features with their CD8<sup>+</sup> counterparts. Here, we present a  
91 comprehensive study of the longevity and phenotype of intestinal CD4<sup>+</sup>T cells in humans. In  
92 a unique transplantation setting we followed the persistence of donor-derived CD4<sup>+</sup>T cells in  
93 grafted duodenum over time and found that the majority of donor CD4<sup>+</sup>T cells are  
94 maintained for at least one year in the graft. Furthermore, both CD103<sup>-</sup> and CD103<sup>+</sup>CD4<sup>+</sup>T  
95 cell populations presented very similar turnover rates, suggesting that both constitute T<sub>RM</sub>  
96 populations. Finally, we showed that the vast majority of both CD103<sup>-</sup> and CD103<sup>+</sup>CD4<sup>+</sup>T<sub>RM</sub>

97 cells were polyfunctional T<sub>H</sub>1 cells and a fraction produced cytotoxic granules after  
98 activation.

99

## 100 **Results**

101

### 102 ***Human intestinal CD4<sup>+</sup> T cells are phenotypically distinct from their circulating*** 103 ***counterparts***

104 To identify CD4<sup>+</sup> T cells with a T<sub>RM</sub>-phenotype in the human small intestine (SI) we first  
105 studied the CD4<sup>+</sup> T-cell compartment under steady state conditions. For this purpose we  
106 collected SI specimens from proximal duodenum-jejunum resections of patients undergoing  
107 pancreatic cancer surgery (Whipple procedure, n = 35; mean age 63yr; 16 female), and from  
108 donors and recipients during pancreatic-duodenal Tx (baseline samples, donors: n = 52;  
109 mean age 31yr; 24 female; patients: n = 36; mean age 41yr; 14 female). All tissue samples  
110 were evaluated by experienced pathologists and only histologically normal SI was included.  
111 Single-cell suspensions from epithelium and enzyme-digested lamina propria (LP) were  
112 obtained and analyzed by flow cytometry together with peripheral blood mononuclear cells  
113 (PBMCs) from the patients. To characterize the phenotypic profile of SI CD4<sup>+</sup> T cells, we  
114 performed flow-cytometry analysis using a panel of antibodies that we recently  
115 implemented to study SI CD8<sup>+</sup> T<sub>RM</sub> cells (Bartolome-Casado et al., 2019). CD4<sup>+</sup> T cells  
116 comprised almost 60% of LP T cells (with a CD4<sup>+</sup>: CD8<sup>+</sup> ratio similar to PB), but constituted  
117 only 10% of T cells in the epithelium (**Figure S1A-B**). The relative distribution of T cell subsets  
118 was conserved in mucosal biopsies sampled up to 35 cm apart from the same intestinal  
119 resection (**Figure S1C**).

120 Applying a dimensionality reduction technique (UMAP, Uniform Manifold  
121 Approximation and Projection) on the compiled flow cytometry data we found that all SI  
122 CD4<sup>+</sup> T cells clustered separate from PB CD4<sup>+</sup> T cells (**Figure 1A, left**). The vast majority of the  
123 SI CD4<sup>+</sup> T cells presented a CD45RA<sup>-</sup> CD45RO<sup>+</sup> L-Sel<sup>-</sup> CCR7<sup>-</sup> effector memory (T<sub>EM</sub>) phenotype  
124 (**Figure 1A-C**). In contrast, PB CD4<sup>+</sup> T cells contained a substantial fraction of naïve (T<sub>N</sub>,  
125 CD45RO<sup>-</sup> CD45RA<sup>+</sup> CCR7<sup>+</sup> L-Sel<sup>+</sup>) and central memory (T<sub>CM</sub>, CD45RO<sup>+</sup> CD45RA<sup>-</sup> CCR7<sup>+</sup> L-Sel<sup>+</sup>)  
126 CD4<sup>+</sup> T cells (**Figure 1A-C**). Virtually all SI CD4<sup>+</sup> T cells expressed the T<sub>RM</sub> marker CD69  
127 whereas all PB CD4<sup>+</sup> T cells were CD69-negative (**Figure 1A, C**). The SI CD4<sup>+</sup> T cells were

128 separated into three clusters based on their differential expression of CD103 and KLRG1  
129 (**Figure 1A**). The population expressing CD103 comprised on average 18% of the LP and 66%  
130 of IE CD4<sup>+</sup> T cells (**Figure 1C, left**), whereas KLRG1 was expressed by 26% and 5% of LP and IE  
131 CD4<sup>+</sup> T cells, respectively (**Figure 1D**). PB CD4<sup>+</sup> T cells were completely negative for CD103,  
132 however a fraction (mean 19%) of PB CD4<sup>+</sup> T<sub>EM</sub> cells expressed KLRG1 (**Figure 1A and D**). PB  
133 CD4<sup>+</sup> T<sub>EM</sub> and SI CD4<sup>+</sup> T cells showed similar expression of PD1, CD127 (IL-7 receptor- $\alpha$ ) and  
134 NKG2D. In contrast, CD28 was significantly higher expressed on PB CD4<sup>+</sup> T<sub>EM</sub> cells, whereas  
135 CD161 was expressed at higher levels on SI CD4<sup>+</sup> T cells (**Figure 1A and D**). In addition, the  
136 immunomodulatory receptor CD244 (2B4) was expressed higher on the IE subset. In line  
137 with other reports (Kumar et al., 2017), we also found that the negative regulator CD101 was  
138 highly expressed by the SI CD4<sup>+</sup> T cells (**Figure 1S-D**). Given that one of the SI CD4<sup>+</sup> T-cell  
139 clusters was enriched in cells expressing the T<sub>RM</sub> marker CD103 (**Figure 1A**), we examined the  
140 differential phenotypic profile of CD103<sup>+</sup> and CD103<sup>-</sup> CD4<sup>+</sup> T cells in LP and in the  
141 epithelium. CD103<sup>-</sup> CD4<sup>+</sup> T cells presented a higher fraction of KLRG1 positive cells in both  
142 compartments, while IE CD103<sup>+</sup> CD4<sup>+</sup> T cells exhibited significantly higher expression of 2B4.  
143 Otherwise we found only small differences between the CD103<sup>+</sup> and CD103<sup>-</sup> subsets  
144 (representative histograms in **Figure 1E** and compiled data in **Figure S1E**).

145 Taken together, these results show that SI CD4<sup>+</sup> T cells were clearly different from  
146 their blood counterparts, being CD69<sup>+</sup> CD103<sup>+/</sup> CD161<sup>+</sup> CD28<sup>low</sup>. The phenotype of IE CD4<sup>+</sup> T  
147 cells was very similar to IE CD8<sup>+</sup> cells; the majority being CD103<sup>+</sup> KLRG1<sup>-</sup> 2B4<sup>+</sup>.

148

#### 149 ***CD4<sup>+</sup> T<sub>RM</sub> cells persist for >1 yr in the transplanted SI***

150 To directly examine the longevity of CD4<sup>+</sup> T<sub>RM</sub> cells in human SI, we assessed the long-  
151 term persistence of donor CD4<sup>+</sup> T cells in endoscopic biopsies obtained from grafted  
152 duodenum at 3, 6 and 52 weeks after pancreatic-duodenal transplantation (Tx) of type I  
153 diabetic patients (Horneland et al., 2015). Only patients without histological or clinical signs  
154 of rejection were included (n=32). Most donors and recipients expressed different human  
155 leukocyte antigen (HLA) type I molecules rendering it possible to distinguish donor cells from  
156 incoming recipient cells in the graft by flow cytometry (**Figure 2A-B**). The CD103<sup>-</sup> and CD103<sup>+</sup>  
157 CD4<sup>+</sup> T cells were analyzed separately. At 3 and 6 weeks, LP and IE CD4<sup>+</sup> T cells exhibited very  
158 low replacement (median >85% donor cells), with no significant differences between the

159 CD103<sup>-</sup> and CD103<sup>+</sup> CD4<sup>+</sup> T subsets (**Figure 2B**). Importantly, also 1-yr after Tx the majority of  
160 SI CD4<sup>+</sup> T cells in both the LP and IE compartments were donor-derived, the fraction being  
161 slightly higher for LP CD103<sup>+</sup> compared to CD103<sup>-</sup> CD4<sup>+</sup> T cells (medians 77% and 60%,  
162 respectively). However, the majority of CD103<sup>-</sup> CD4<sup>+</sup> T cells were still of donor origin at 1 yr  
163 post-Tx, demonstrating that CD103 expression is not required for the persistence of CD4<sup>+</sup>  
164 T<sub>RM</sub> cells in human SI. In line with this, the turnover of both IE and LP CD103<sup>+</sup> and CD103<sup>-</sup>  
165 cells was highly correlated at 1 yr post-Tx (**Figure 2C**). Moreover, at 1 yr post-Tx the CD103<sup>-</sup>  
166 and CD103<sup>+</sup> CD4<sup>+</sup> T-cell subsets contained a similar (or higher) proportion of donor cells  
167 compared to donor CD8<sup>+</sup> T cell subsets (**Figure 2D**) (Bartolome-Casado et al., 2019). To  
168 confirm the persistence of donor CD4<sup>+</sup> T cells we performed immunostaining with anti-CD3  
169 and anti-CD4 antibodies combined with fluorescent *in situ* hybridization probes specific for  
170 X/Y-chromosomes on tissue sections where recipients and donors were of different gender  
171 and consistently observed donor-derived CD4<sup>+</sup> T cells in the graft 1-yr after Tx (**Figure 2E**).

172         These results showed that the majority of donor-derived SI CD4<sup>+</sup> T cells persisted at  
173 least 1 yr (possibly years) in the tissue. However, to exclude effects of the surgical trauma,  
174 immunosuppressive treatment and leukocyte chimerism on the SI CD4<sup>+</sup> T-cell population, we  
175 examined the absolute T-cell counts in SI over time. Serial tissue sections were stained for  
176 CD3 and CD8, scanned and counted. The density of CD4<sup>+</sup> T cells was determined by  
177 subtracting the number of CD8<sup>+</sup> cells from the total CD3<sup>+</sup> cell count. We found that the  
178 overall density of both CD4<sup>+</sup> and CD8<sup>+</sup> T cells in Tx duodenum was stable throughout the 1-yr  
179 follow-up period (**Figure S2A-B**). Intracellular staining of single cell suspensions from Tx  
180 biopsies with the proliferation marker Ki67 showed few Ki67-positive cells among the donor  
181 CD4<sup>+</sup> T cells (**Figure S2C-D**). The percentage of Ki67<sup>+</sup> CD4<sup>+</sup> T cells was similar to that seen in  
182 the native duodenum in Tx patients and in steady state controls (**Figure S2D**), indicating that  
183 proliferation did not contribute substantially to the large number of persisting donor CD4<sup>+</sup> T  
184 cells in transplanted SI. Finally, we confirmed that the CD4<sup>+</sup> T cells in the native (recipient)  
185 duodenum were exclusively recipient-derived (**Figure S3**), demonstrating that migration of  
186 donor cells out of the graft was not occurring.

187         In conclusion, these results show that the CD4<sup>+</sup> T<sub>RM</sub> cell population includes both  
188 CD103<sup>-</sup> and CD103<sup>+</sup> cells, and that CD4<sup>+</sup> T<sub>RM</sub> cells are at least as persistent as CD103<sup>+</sup> CD8<sup>+</sup>  
189 T<sub>RM</sub> cells (Bartolome-Casado et al., 2019) in the transplanted SI.

190

191 ***Incoming recipient CD4<sup>+</sup> T cells undergo gradual phenotypic changes over time in***  
192 ***transplanted duodenum***

193 Transplanted SI gives us a unique opportunity to study the differentiation of recruited  
194 incoming CD4<sup>+</sup> T cells and whether they acquire a T<sub>RM</sub> phenotype in SI mucosa. To this end,  
195 we compared the expression of T<sub>RM</sub> associated markers on donor- and recipient- derived LP  
196 CD4<sup>+</sup> T cells from biopsies of transplanted duodenum over time. Already at 3 wk post-Tx,  
197 virtually all recipient LP CD4<sup>+</sup> T cells expressed CD69 (**Figure 3A**). More than half of recipient  
198 CD4<sup>+</sup> T cells expressed CD161 at 6 weeks and that was further increased at 1-yr post Tx to  
199 similar levels as donor CD4<sup>+</sup> T cells (**Figure 3B**). CD103 was expressed on a minor subset of  
200 recipient-derived CD4<sup>+</sup> T cells at both 6 and 52 weeks; slightly lower than that on donor CD4<sup>+</sup>  
201 T cells (**Figure 3C, E**). In contrast, the fraction of KLRG1-positive cells within donor and  
202 recipient-derived CD4<sup>+</sup> T cells remained almost unchanged (**Figure 3D-E**). Similarly to the  
203 steady state conditions (**Figure 1A**), the majority of the LP CD4<sup>+</sup> T cells were CD103<sup>-</sup> KLRG1<sup>-</sup>  
204 at all the time points regardless of their origin (**Figure 3E**). Furthermore, the turnover of  
205 donor LP CD103<sup>-</sup> KLRG1<sup>-</sup> and CD103<sup>-</sup> KLRG1<sup>+</sup> CD4<sup>+</sup> T cells were very similar, evidenced by the  
206 high correlation of donor-derived cells within both subsets over time (**Figure 3F**).

207 Together, we find that recipient CD4<sup>+</sup> T cells recruited to the transplanted duodenum  
208 rapidly acquire phenotypic features similar to persistent donor CD4<sup>+</sup> T cells (**Figure 2**),  
209 suggesting that they gradually differentiate into T<sub>RM</sub> *in situ*.

210

211 ***The majority of SI CD4<sup>+</sup> T cells exhibits a polyfunctional T<sub>H1</sub> profile***

212 To examine the functional properties of SI CD4<sup>+</sup> T cells we studied their cytokine expression  
213 profile and ability to produce cytotoxic granules. First, LP CD4<sup>+</sup> T cells isolated from  
214 histologically normal SI were short-term stimulated with PMA and Ionomycin and  
215 intracellular staining was performed with antibodies targeting specific cytokines (**Table S1**). By  
216 flow-cytometric analysis we found that the majority of the LP CD4<sup>+</sup> T cells, both CD103<sup>-</sup> and  
217 CD103<sup>+</sup>, produced IFN- $\gamma$ , IL-2 and TNF- $\alpha$  (**Figure 4A**). Almost half of the cells produced all  
218 these three cytokines simultaneously (**Figure 4B-C**), and we did not find significant  
219 differences between CD103<sup>-</sup> KLRG1<sup>+</sup> and KLRG1<sup>-</sup> cells (**Figure S4A**). In contrast, triple-  
220 producing cells constituted only 4% of the memory CD4<sup>+</sup> T cells in PB (**Figure 4B-C**).

221 Comparing the LP CD103<sup>-</sup> and CD103<sup>+</sup> subsets, we found significantly higher fraction of IL-17  
222 and MIP1- $\beta$ -producing cells within the CD103<sup>+</sup> subset compared to CD103<sup>-</sup> CD4<sup>+</sup> T cell subset  
223 **(Figure 4A)**. Furthermore, CD103<sup>+</sup> CD4<sup>+</sup> T cells contained a higher fraction of IFN- $\gamma$ <sup>+</sup> IL-17<sup>+</sup>  
224 double producing cells **(Figure 4D)**. In contrast, CD103<sup>-</sup> CD4<sup>+</sup> T cells presented higher  
225 numbers of IL-13-producing cells than their CD103<sup>+</sup> counterparts, whereas comparable  
226 expression of IL-10 and IL-22 was found in the two subsets **(Figure 4A)**.

227 Murine CD4<sup>+</sup> T<sub>RM</sub> cells have exhibited upregulation of granzyme-B upon  
228 reactivation with their cognate antigen (Beura et al., 2019). We therefore analyzed the  
229 capacity of SI CD4<sup>+</sup> T cells to produce granzyme-B or perforin at the steady state and after  
230 stimulation with anti-CD3/CD28 beads. In the absence of stimulation, very few cells  
231 expressed these cytolytic proteins, however, both LP CD103<sup>-</sup> and CD103<sup>+</sup> subsets increased  
232 their expression of granzyme-B and perforin after activation **(Figure 5)**. We found a  
233 significantly higher proportion of granzyme-B producing cells within the LP CD103<sup>+</sup> subset as  
234 compared to the CD103<sup>-</sup> CD4<sup>+</sup> T cell subset **(Figure 5)**. On the other hand, no significant  
235 differences were found in the activation-induced production of perforin between either  
236 subsets. **(Figure 5)**. Comparing the KLRG1<sup>+</sup> and KLRG1<sup>-</sup> cells in the LP CD103<sup>-</sup> compartment,  
237 we found higher basal levels of granzyme-B among the KLRG1<sup>+</sup> cells **(Figure S4B)**, but similar  
238 levels of granzyme-B and perforin after stimulation **(Figure S4B-C)**.

239 These data show that the majority of the SI CD4<sup>+</sup> T<sub>RM</sub> cells are polyfunctional T<sub>H</sub>1 cells,  
240 with a large fraction co-producing IFN- $\gamma$ , IL-2 and TNF- $\alpha$ . A fraction of CD4<sup>+</sup> T<sub>RM</sub> cells also  
241 produces the cytotoxic proteins granzyme-B and perforin after stimulation.

242

## 243 **Discussion**

244

245 Over the last years it has been demonstrated that immunosurveillance by memory CD8<sup>+</sup> T  
246 cell in barrier tissues is largely mediated by durable, resident cell populations. However,  
247 whether memory CD4<sup>+</sup> T cells use similar surveillance strategies is less clear (Carbone and  
248 Gebhardt, 2019; Homann et al., 2001; Snyder et al., 2019; Watanabe et al., 2015). Here, we  
249 show that the majority of CD4<sup>+</sup> T cells are persistent for at least for 1 yr in the human SI  
250 mucosa, where they exhibit robust effector functions including polyfunctional T<sub>H</sub>1 responses.



251           There is conflicting evidence with regards to the long-term residency of memory CD4<sup>+</sup>  
252 T cells in barrier tissues. Studies of CD4<sup>+</sup> T<sub>RM</sub> cells using parabiotic mice have suggested that  
253 CD4<sup>+</sup> T-cell surveillance in the skin was dependent on continuous recirculation rather than  
254 permanent residency (Collins et al., 2016; Gebhardt et al., 2011). However, evidence of CD4<sup>+</sup>  
255 T<sub>RM</sub> cells persistence has been reported in other peripheral tissues, such as the reproductive  
256 mucosa and lung (Iijima and Iwasaki, 2014; Teijaro et al., 2011). Similarly, Beura et al.  
257 recently demonstrated that residency is the dominant mechanism of memory CD4<sup>+</sup> T-cell  
258 immunosurveillance in non-lymphoid tissues, but they did not evaluate the longevity (Beura  
259 et al., 2019). Moreover, in a recent study Klicznik and colleagues discovered a population of  
260 skin CD103<sup>+</sup> CD69<sup>+</sup> CD4<sup>+</sup> T cells that were able to downregulate CD69 expression and enter  
261 the circulation, indicating that some CD4<sup>+</sup> T<sub>RM</sub> cells may retain migratory potential (Klicznik  
262 et al., 2019).

263           In mouse models of infection, the number of antigen-specific memory CD4<sup>+</sup> T cells in  
264 lymphoid and non-lymphoid tissues seem to decline faster than CD8<sup>+</sup> T cells (Cauley et al.,  
265 2002; Homann et al., 2001), suggesting that memory CD4<sup>+</sup> T cells are less durable. In line  
266 with these results, donor CD4<sup>+</sup> T cells in lung transplanted patients were more rapidly lost  
267 than CD8<sup>+</sup> T cells (Snyder et al., 2019). Here, we found that donor CD4<sup>+</sup> T cells were  
268 maintained in duodenal grafts at equal or even higher numbers than CD103<sup>+</sup> CD8<sup>+</sup> T cells 1 yr  
269 after transplantation, without any change in cell density. In fact, in several patients more  
270 than 80% of the CD4<sup>+</sup> T cells were donor-derived at 1 yr. It is reasonable to assume that the  
271 host response to an organ transplantation would increase, rather than decrease, the  
272 replacement kinetics of immune cells in the graft (Eguiluz-Gracia et al., 2016; Snyder et al.,  
273 2019; Zuber et al., 2016), together indicating that most CD4<sup>+</sup> T cells in human SI are non-  
274 circulating, resident cells that most likely perpetuate for years.

275           Similar to intestinal CD8<sup>+</sup> T<sub>RM</sub> cells (Bartolome-Casado et al., 2019), we found that  
276 virtually all the SI CD4<sup>+</sup> T cells expressed CD69 and CD161. However, unlike CD8<sup>+</sup> T cells, only  
277 a minor fraction of LP CD4<sup>+</sup> T cells expressed the  $\alpha_E$  integrin, CD103. While CD103<sup>-</sup> CD8<sup>+</sup> T  
278 cells very rapidly turned over in transplanted duodenum (**Figure 2E** and (Bartolome-Casado  
279 et al., 2019)), both CD103<sup>-</sup> and CD103<sup>+</sup> CD4<sup>+</sup> T cells showed a similar persistence. These  
280 results show that retention of CD4<sup>+</sup> T cells is independent of CD103, in line with previous  
281 reports (Romagnoli et al., 2017).

282 Like murine CD4<sup>+</sup> T<sub>RM</sub> cells (Iijima and Iwasaki, 2014; Romagnoli et al., 2017), the vast  
283 majority of LP CD4<sup>+</sup> T<sub>RM</sub> cells exhibited a polyfunctional T<sub>H1</sub> profile, producing high amounts  
284 of IFN- $\gamma$ , IL-2 and TNF- $\alpha$ . The fraction of polyfunctional T<sub>H1</sub> cells among SI CD4<sup>+</sup> T cells was  
285 much higher than among memory CD4<sup>+</sup> T cells in blood. Furthermore, >40% of the CD4<sup>+</sup> T<sub>RM</sub>  
286 cells expressed granzyme-B after stimulation. These results show that SI CD4<sup>+</sup> T<sub>RM</sub> cells, like  
287 CD8<sup>+</sup> T<sub>RM</sub> cells, undergo tissue-specific changes that make them poised to provide robust T<sub>H1</sub>  
288 immunity in response to reinfections (Beura et al., 2019; Pope et al., 2001). In addition to  
289 protection against pathogens (Romagnoli et al., 2017), long-lived CD4<sup>+</sup> T cell responses to  
290 commensal bacteria have been found during acute gastrointestinal infection with *T. gondii*  
291 (Hand et al., 2012). Moreover, microbiota-specific CD4<sup>+</sup> T cells have been identified in blood  
292 and intestinal biopsies from healthy humans (Hegazy et al., 2017), indicating that CD4<sup>+</sup> T<sub>RM</sub>  
293 cells may actively contribute to intestinal homeostasis through interactions with the  
294 microbiota.

295 We found that a fraction of CD4<sup>+</sup> T<sub>RM</sub> cells produced IL-17. T<sub>H17</sub> cells play an  
296 important role in intestinal inflammatory disorders (Kleinschek et al., 2009; Ouyang et al.,  
297 2008; Yang et al., 2014; Zundler et al., 2019), however IL-17 is also critical for maintaining  
298 mucosal barrier integrity (Martinez-Lopez et al., 2019; Ouyang et al., 2008). Recently it was  
299 reported that, in contrast to inflammatory T<sub>H17</sub> cells elicited by pathogens, gut commensal  
300 bacteria elicited tissue-resident homeostatic T<sub>H17</sub> cells, which showed limited capacity to  
301 produce inflammatory cytokines (Omenetti et al., 2019). In our study only a very small  
302 percentage of T<sub>H17</sub> cells co-produced the inflammatory cytokine IFN- $\gamma$ , suggesting that the  
303 majority of SI T<sub>H17</sub> cells during homeostasis are non-inflammatory cells that support barrier  
304 integrity. However, further studies are needed to understand the role of SI T<sub>H17</sub> cells under  
305 homeostatic and inflammatory conditions.

306 Finally, we found, although marginally, that CD103<sup>+</sup> T<sub>RM</sub> cells contained higher  
307 fractions of IL-17 single- and IL-17/IFN- $\gamma$  double-producing cells than their CD103<sup>-</sup>  
308 counterparts. Moreover, CD103<sup>-</sup> and CD103<sup>+</sup> CD4<sup>+</sup> T cells also showed subtle phenotypic  
309 differences regarding their expression of KLRG1, CD28 and 2B4. However, to what extent the  
310 CD103<sup>+</sup> and CD103<sup>-</sup> subsets represents distinct functional subsets needs further  
311 investigation.

312 In conclusion, we provide evidence that the majority of memory CD4<sup>+</sup> T cells in the  
313 human SI are resident and may persist in the tissue for >1 year. This indicates that residency  
314 constitute the dominant mechanism for CD4<sup>+</sup> memory T cell immunosurveillance in the  
315 human SI, and should be explored for the development of oral vaccines as well as for  
316 strategies to treat CD4<sup>+</sup> T-cell mediated inflammatory intestinal diseases.

317

318

## 319 **Materials and Methods**

### 320 *Patient samples.*

321 Small intestinal samples were either obtained during pancreatic cancer surgery (Whipple  
322 procedure, n = 35; mean age 63yr; range 40-81yr; 16 female), or from donors and/or  
323 patients during pancreas-duodenum transplantation (donors: n = 52; mean age 31yr; range  
324 5-55yr; 24 female; patients: n = 36; mean age 41yr; range 25-60yr; 14 female) as described  
325 previously (Bartolome-Casado et al., 2019). Cancer patients receiving neoadjuvant  
326 chemotherapy were excluded from the study. Endoscopic biopsies from donor and patient  
327 duodenum were collected at 3, 6 and 52 weeks after transplantation. All tissue specimens  
328 were evaluated blindly by experienced pathologists, and only material with normal histology  
329 was included (Ruiz et al., 2010). All transplanted patients received a standard  
330 immunosuppressive regimen (Horneland et al., 2015), and patients showing clinical or  
331 histological signs of rejection or other complications, as well as patients presenting pre-  
332 transplant or *de novo* donor specific antibodies (DSA) were excluded from the study. Blood  
333 samples were collected at the time of the surgery and buffy coats from healthy donors (Oslo  
334 University Hospital). All participants gave their written informed consent. The study was  
335 approved by the Regional Committee for Medical Research Ethics in Southeast Norway and  
336 complies with the Declaration of Helsinki.

337

### 338 *Preparation of intestinal and peripheral blood single-cell suspensions*

339 Intestinal resections were opened longitudinally and rinsed with PBS, and mucosa was  
340 dissected in strips off the submucosa. For microscopy, small mucosal pieces were fixed in 4%  
341 formalin and embedded in paraffin according to standard protocols. Intestinal mucosa was

342 washed 3 times in PBS containing 2mM EDTA and 1% FCS at 37°C with shaking for 20  
343 minutes and filtered through nylon 100-µm mesh to remove epithelial cells. Epithelial  
344 fractions in each washing step were pooled and filtered through 100-µm cell strainers (BD,  
345 Falcon). Epithelial cells in the EDTA fraction were depleted by incubation with anti-human  
346 epithelial antigen antibody (clone Ber-EP4, Dako) followed by anti-mouse IgG dynabeads  
347 (ThermoFisher) according to the manufacture's protocol. De-epithelialized LP was minced  
348 and digested in complete RPMI medium (supplemented with 1% Pen/Strep) containing 0.25  
349 mg/mL Liberase TL and 20 U/mL DNase I (both from Roche), stirring at 37°C for 1h. Digested  
350 tissue was filtered twice through 100-µm cell strainers and washed tree times in PBS. Purity  
351 of both IE and LP fractions was checked by flow-cytometry (Bartolome-Casado et al., 2019).  
352 Intestinal biopsies from transplanted patients were processed in the same way. PBMCs were  
353 isolated by Ficoll-based density gradient centrifugation (Lymphoprep™, Axis-Shield).

354

#### 355 *Flow cytometry*

356 Single cell suspensions of intestinal LP and IE fractions and PBMCs were stained using  
357 different multicolor combinations of directly conjugated monoclonal antibodies (**Table S1**).  
358 To assess the expression of L-Selectin on digested tissue, cells were rested for 12h at 37°C  
359 before the immunostaining. Replacement of donor cells in duodenal biopsies of HLA  
360 mismatched transplanted patients was assessed using different HLA type I allotype-specific  
361 antibodies targeting donor- and/or recipient-derived cells, and stroma cells were used as a  
362 control of specific staining. Dead cells were excluded based on propidium iodide staining  
363 (Molecular Probes, Life Technologies). For analysis of cytokine production, LP and IE cell  
364 suspensions were stimulated for 4h with control complete medium (RPMI supplemented  
365 with 10% FCS, 1% Pen/Strep) or phorbol-12-myristate-13-acetate PMA (1.5 ng/mL) and  
366 ionomycin (1µg/mL; both from Sigma-Aldrich) in the presence of monensin (Golgi Stop, BD  
367 Biosciences) added after 1h of stimulation to allow intracellular accumulation of cytokines.  
368 Cells were stained using the BD Cytofix/Cytoperm kit (BD Biosciences) according to the  
369 manufacturer's instructions, and stained with antibodies against several cytokines (**Table**  
370 **S1**). For detection of cytotoxic granules, LP and IE cells were activated for 21h with anti-  
371 CD3/CD28 beads (Dynabeads, ThermoFisher) or control complete medium. For detection of  
372 intranuclear Ki67 expression the FoxP3/transcription factor staining buffer set was used

373 according to the manufacturer's instructions. eFluor-450 or eFluor-780 fixable viability dyes  
374 (eBioscience) were used prior any intracellular/intranuclear staining procedure. All samples  
375 were acquired on LSR Fortessa flow cytometer (BD Biosciences), using FACSDiva software  
376 (BD Biosciences). Single stained controls were prepared for compensation (UltraComp  
377 eBeads™, eBioscience), and gates were adjusted by comparison with FMO controls or  
378 matched isotype controls. Flow cytometry data were analyzed using FlowJo 10.4.2 (Tree  
379 Star). For **Figure 1A**, the expression of 16 phenotypic markers was analyzed at the single cell-  
380 level and compared for CD4<sup>+</sup> T cells in PB, LP and IE (n=3) using the merge and calculation  
381 functions of Infinicyt software (Cytognos), as described in detail elsewhere (Pedreira et al.,  
382 2013). The population within the CD4<sup>+</sup> T-cell gate was down-sampled for each compartment  
383 and exported to a new file, and then concatenated and subjected to UAMP analysis using  
384 the plugin integrated in FlowJo 10.5.3 as in (Bartolome-Casado et al., 2019). All experiments  
385 were performed at the Flow Cytometry Core Facility, Oslo University Hospital.

386

#### 387 *Microscopy.*

388 Analysis of chimerism was performed as described previously (Landsverk et al., 2017).  
389 Briefly, formalin-fixed 4-µm sections were washed sequentially in xylene, ethanol, and PBS.  
390 Heat-induced epitope retrieval was performed by boiling sections for 20min in Dako buffer.  
391 Sections were incubated with CEP X SpectrumOrange/Y SpectrumGreen DNA Probes (Abbott  
392 Molecular Inc.) for 12h at 37°C before immunostaining according to standard protocol with  
393 anti-CD3 (Polyclonal; Dako), anti-CD4 (clone 1F6, Leica Biosystems) and secondary antibodies  
394 targeting rabbit IgG or mouse IgG2b conjugated to Alexa Fluor 647 and 555, respectively.  
395 Laser scanning confocal microscopy was performed on an Olympus FV1000 (BX61WI)  
396 system. Image z stacks were acquired at 1-µm intervals and combined using the Z project  
397 max intensity function in Image J (National Institutes of Health), and all microscopy images  
398 were assembled in Photoshop and Illustrator CC (Adobe).

399 CD8 and CD3 immunoenzymatic staining was performed on formalin-fixed 4-µm sections,  
400 dewaxed in xylene and rehydrated in ethanol, and prepared with Vulcan Fast red kit (Biocare  
401 Medical) following standard protocols. In brief, heat-induced antigen retrieval was  
402 performed in Tris/EDTA pH9 buffer (EnVision FLEX Dako kit, K8010), followed by staining  
403 with primary antibody (CD8 clone 4B11, Novocastra or CD3, polyclonal, Dako), secondary

404 anti- mouse AP-conjugated antibody and incubation with substrate (Fast red chromogen,  
405 Biocare Medical). Slides were counterstained with hematoxylin and excess of dye was  
406 removed by bluing in ammoniac water. Tissue sections were scanned using Panoramic Midi  
407 slide scanner (3DHISTECH) and counts generated with QuPath software (Bankhead et al.,  
408 2017).

409

#### 410 *Statistical analysis*

411 Statistical analyses were performed in Prism 8 (GraphPad Software). To assess statistical  
412 significance among SI CD4<sup>+</sup> T cell subsets, data were analyzed by one-way ANOVA (standard  
413 or repeated measures, RM-ANOVA) followed by Tukey's multiple comparison tests.  
414 Replacement data and distribution of CD4<sup>+</sup> T cell subsets at different time points were  
415 analyzed by two-way ANOVA matching across subsets followed by Tukey's multiple  
416 comparison tests. Correlations between replacement kinetics of different CD4<sup>+</sup> T cell subsets  
417 were calculated using Pearson correlation with two-tailed p-value (95% confidence interval).  
418 P-values of <0.05 were considered significant.

419

#### 420 **References:**

- 421 Bankhead, P., M.B. Loughrey, J.A. Fernandez, Y. Dombrowski, D.G. McArt, P.D. Dunne, S. McQuaid,  
422 R.T. Gray, L.J. Murray, H.G. Coleman, J.A. James, M. Salto-Tellez, and P.W. Hamilton. 2017.  
423 QuPath: Open source software for digital pathology image analysis. *Sci Rep* 7:16878.
- 424 Bartolome-Casado, R., O.J.B. Landsverk, S.K. Chauhan, L. Richter, D. Phung, V. Greiff, L.F. Risnes, Y.  
425 Yao, R.S. Neumann, S. Yaqub, O. Oyen, R. Horneland, E.M. Aandahl, V. Paulsen, L.M. Sollid,  
426 S.W. Qiao, E.S. Baekkevold, and F.L. Jahnsen. 2019. Resident memory CD8 T cells persist for  
427 years in human small intestine. *J Exp Med*
- 428 Becattini, S., D. Latorre, F. Mele, M. Foglierini, C. De Gregorio, A. Cassotta, B. Fernandez, S.  
429 Kelderman, T.N. Schumacher, D. Corti, A. Lanzavecchia, and F. Sallusto. 2015. T cell  
430 immunity. Functional heterogeneity of human memory CD4(+) T cell clones primed by  
431 pathogens or vaccines. *Science* 347:400-406.
- 432 Beura, L.K., N.J. Fares-Frederickson, E.M. Steinert, M.C. Scott, E.A. Thompson, K.A. Fraser, J.M.  
433 Schenkel, V. Vezys, and D. Masopust. 2019. CD4+ resident memory T cells dominate  
434 immunosurveillance and orchestrate local recall responses. *The Journal of Experimental*  
435 *Medicine*
- 436 Beura, L.K., J.S. Mitchell, E.A. Thompson, J.M. Schenkel, J. Mohammed, S. Wijeyesinghe, R. Fonseca,  
437 B.J. Burbach, H.D. Hickman, V. Vezys, B.T. Fife, and D. Masopust. 2018. Intravital mucosal  
438 imaging of CD8(+) resident memory T cells shows tissue-autonomous recall responses that  
439 amplify secondary memory. *Nat Immunol* 19:173-182.
- 440 Bishu, S., G. Hou, M. El Zaatari, S.R. Bishu, D. Popke, M. Zhang, H. Grasberger, W. Zou, R.W. Stidham,  
441 P.D.R. Higgins, J.R. Spence, N. Kamada, and J.Y. Kao. 2019. Citrobacter rodentium Induces  
442 Tissue-Resident Memory CD4(+) T Cells. *Infect Immun* 87:

- 443 Brucklacher-Waldert, V., E.J. Carr, M.A. Linterman, and M. Veldhoen. 2014. Cellular Plasticity of CD4+  
444 T Cells in the Intestine. *Front Immunol* 5:488.
- 445 Carbone, F.R., and T. Gebhardt. 2019. Should I stay or should I go-Reconciling clashing perspectives  
446 on CD4(+) tissue-resident memory T cells. *Sci Immunol* 4:
- 447 Cauley, L.S., T. Cookenham, T.B. Miller, P.S. Adams, K.M. Vignali, D.A. Vignali, and D.L. Woodland.  
448 2002. Cutting edge: virus-specific CD4+ memory T cells in nonlymphoid tissues express a  
449 highly activated phenotype. *J Immunol* 169:6655-6658.
- 450 Cepek, K.L., S.K. Shaw, C.M. Parker, G.J. Russell, J.S. Morrow, D.L. Rimm, and M.B. Brenner. 1994.  
451 Adhesion between epithelial cells and T lymphocytes mediated by E-cadherin and the alpha E  
452 beta 7 integrin. *Nature* 372:190-193.
- 453 Christophersen, A., E.G. Lund, O. Snir, E. Sola, C. Kanduri, S. Dahal-Koirala, S. Zuhlke, O. Molberg, P.J.  
454 Utz, M. Rohani-Pichavant, J.F. Simard, C.L. Dekker, K.E.A. Lundin, L.M. Sollid, and M.M. Davis.  
455 2019. Distinct phenotype of CD4(+) T cells driving celiac disease identified in multiple  
456 autoimmune conditions. *Nat Med* 25:734-737.
- 457 Collins, N., X. Jiang, A. Zaid, B.L. Macleod, J. Li, C.O. Park, A. Haque, S. Bedoui, W.R. Heath, S.N.  
458 Mueller, T.S. Kupper, T. Gebhardt, and F.R. Carbone. 2016. Skin CD4(+) memory T cells  
459 exhibit combined cluster-mediated retention and equilibration with the circulation. *Nat*  
460 *Commun* 7:11514.
- 461 Eguiluz-Gracia, I., H.H. Schultz, L.I. Sikkeland, E. Danilova, A.M. Holm, C.J. Pronk, W.W. Agace, M.  
462 Iversen, C. Andersen, F.L. Jahnsen, and E.S. Baekkevold. 2016. Long-term persistence of  
463 human donor alveolar macrophages in lung transplant recipients. *Thorax* 71:1006-1011.
- 464 Gebhardt, T., P.G. Whitney, A. Zaid, L.K. Mackay, A.G. Brooks, W.R. Heath, F.R. Carbone, and S.N.  
465 Mueller. 2011. Different patterns of peripheral migration by memory CD4+ and CD8+ T cells.  
466 *Nature* 477:216-219.
- 467 Glennie, N.D., V.A. Yeramilli, D.P. Beiting, S.W. Volk, C.T. Weaver, and P. Scott. 2015. Skin-resident  
468 memory CD4+ T cells enhance protection against *Leishmania major* infection. *J Exp Med*  
469 212:1405-1414.
- 470 Hand, T.W., L.M. Dos Santos, N. Bouladoux, M.J. Molloy, A.J. Pagan, M. Pepper, C.L. Maynard, C.O.  
471 Elson, 3rd, and Y. Belkaid. 2012. Acute gastrointestinal infection induces long-lived  
472 microbiota-specific T cell responses. *Science* 337:1553-1556.
- 473 Hegazy, A.N., N.R. West, M.J.T. Stubbington, E. Wendt, K.I.M. Suijker, A. Datsi, S. This, C. Danne, S.  
474 Champion, S.H. Duncan, B.M.J. Owens, H.H. Uhlig, A. McMichael, I.B.D.C.I. Oxford, A.  
475 Bergthaler, S.A. Teichmann, S. Keshav, and F. Powrie. 2017. Circulating and Tissue-Resident  
476 CD4(+) T Cells With Reactivity to Intestinal Microbiota Are Abundant in Healthy Individuals  
477 and Function Is Altered During Inflammation. *Gastroenterology* 153:1320-1337 e1316.
- 478 Homann, D., L. Teyton, and M.B. Oldstone. 2001. Differential regulation of antiviral T-cell immunity  
479 results in stable CD8+ but declining CD4+ T-cell memory. *Nat Med* 7:913-919.
- 480 Hondowicz, B.D., D. An, J.M. Schenkel, K.S. Kim, H.R. Steach, A.T. Krishnamurty, G.J. Keitany, E.N.  
481 Garza, K.A. Fraser, J.J. Moon, W.A. Altemeier, D. Masopust, and M. Pepper. 2016. Interleukin-  
482 2-Dependent Allergen-Specific Tissue-Resident Memory Cells Drive Asthma. *Immunity*  
483 44:155-166.
- 484 Horneland, R., V. Paulsen, J.P. Lindahl, K. Grzyb, T.J. Eide, K. Lundin, L. Aabakken, T. Jenssen, E.M.  
485 Aandahl, A. Foss, and O. Oyen. 2015. Pancreas transplantation with enteroanastomosis to  
486 native duodenum poses technical challenges--but offers improved endoscopic access for  
487 scheduled biopsies and therapeutic interventions. *Am J Transplant* 15:242-250.
- 488 Iijima, N., and A. Iwasaki. 2014. T cell memory. A local macrophage chemokine network sustains  
489 protective tissue-resident memory CD4 T cells. *Science* 346:93-98.
- 490 Kleinschek, M.A., K. Boniface, S. Sadekova, J. Grein, E.E. Murphy, S.P. Turner, L. Raskin, B. Desai, W.A.  
491 Faubion, R. de Waal Malefyt, R.H. Pierce, T. McClanahan, and R.A. Kastelein. 2009. Circulating  
492 and gut-resident human Th17 cells express CD161 and promote intestinal inflammation. *J*  
493 *Exp Med* 206:525-534.

- 494 Klicznik, M.M., P.A. Morawski, B. Höllbacher, S.R. Varkhande, S.J. Motley, L. Kuri-Cervantes, E.  
495 Goodwin, M.D. Rosenblum, S.A. Long, G. Brachtl, T. Duhon, M.R. Betts, D.J. Campbell, and I.K.  
496 Gratz. 2019. Human CD4+CD103+ cutaneous resident memory T cells are found in the  
497 circulation of healthy individuals. *Science Immunology* 4:  
498 Klonowski, K.D., K.J. Williams, A.L. Marzo, D.A. Blair, E.G. Lingenheld, and L. Lefrançois. 2004.  
499 Dynamics of Blood-Borne CD8 Memory T Cell Migration In Vivo. *Immunity* 20:551-562.  
500 Kumar, B.V., W. Ma, M. Miron, T. Granot, R.S. Guyer, D.J. Carpenter, T. Senda, X. Sun, S.H. Ho, H.  
501 Lerner, A.L. Friedman, Y. Shen, and D.L. Farber. 2017. Human Tissue-Resident Memory T Cells  
502 Are Defined by Core Transcriptional and Functional Signatures in Lymphoid and Mucosal  
503 Sites. *Cell Rep* 20:2921-2934.  
504 Lamb, C.A., J.C. Mansfield, G.W. Tew, D. Gibbons, A.K. Long, P. Irving, L. Diehl, J. Eastham-Anderson,  
505 M.B. Price, G. O'Boyle, D.E.J. Jones, S. O'Byrne, A. Hayday, M.E. Keir, J.G. Egen, and J.A. Kirby.  
506 2017. alphaEbeta7 Integrin Identifies Subsets of Pro-Inflammatory Colonic CD4+ T  
507 Lymphocytes in Ulcerative Colitis. *J Crohns Colitis* 11:610-620.  
508 Landsverk, O.J., O. Snir, R.B. Casado, L. Richter, J.E. Mold, P. Reu, R. Horneland, V. Paulsen, S. Yaqub,  
509 E.M. Aandahl, O.M. Oyen, H.S. Thorarensen, M. Salehpour, G. Possnert, J. Frisen, L.M. Sollid,  
510 E.S. Baekkevold, and F.L. Jahnsen. 2017. Antibody-secreting plasma cells persist for decades  
511 in human intestine. *J Exp Med* 214:309-317.  
512 Mackay, L.K., A. Rahimpour, J.Z. Ma, N. Collins, A.T. Stock, M.L. Hafon, J. Vega-Ramos, P. Lauzurica,  
513 S.N. Mueller, T. Stefanovic, D.C. Tschärke, W.R. Heath, M. Inouye, F.R. Carbone, and T.  
514 Gebhardt. 2013. The developmental pathway for CD103(+)/CD8+ tissue-resident memory T  
515 cells of skin. *Nat Immunol* 14:1294-1301.  
516 Martinez-Lopez, M., S. Iborra, R. Conde-Garrosa, A. Mastrangelo, C. Danne, E.R. Mann, D.M. Reid, V.  
517 Gaboriau-Routhiau, M. Chaparro, M.P. Lorenzo, L. Minnerup, P. Saz-Leal, E. Slack, B. Kemp,  
518 J.P. Gisbert, A. Dzionek, M.J. Robinson, F.J. Ruperez, N. Cerf-Bensussan, G.D. Brown, D.  
519 Bernardo, S. LeibundGut-Landmann, and D. Sancho. 2019. Microbiota Sensing by Mincle-Syk  
520 Axis in Dendritic Cells Regulates Interleukin-17 and -22 Production and Promotes Intestinal  
521 Barrier Integrity. *Immunity* 50:446-461 e449.  
522 Masopust, D., and A.G. Soerens. 2019. Tissue-Resident T Cells and Other Resident Leukocytes. *Annu*  
523 *Rev Immunol*  
524 Masopust, D., V. Vezys, A.L. Marzo, and L. Lefrançois. 2001. Preferential localization of effector  
525 memory cells in nonlymphoid tissue. *Science* 291:2413-2417.  
526 Mueller, S.N., and L.K. Mackay. 2016. Tissue-resident memory T cells: local specialists in immune  
527 defence. *Nat Rev Immunol* 16:79-89.  
528 Oja, A.E., B. Piet, C. Helbig, R. Stark, D. van der Zwan, H. Blaauwgeers, E.B.M. Remmerswaal, D.  
529 Amsen, R.E. Jonkers, P.D. Moerland, M.A. Nolte, R.A.W. van Lier, and P. Hombrink. 2018.  
530 Trigger-happy resident memory CD4(+) T cells inhabit the human lungs. *Mucosal Immunol*  
531 11:654-667.  
532 Omenetti, S., C. Bussi, A. Metidji, A. Iseppon, S. Lee, M. Tolaini, Y. Li, G. Kelly, P. Chakravarty, S.  
533 Shoaie, M.G. Gutierrez, and B. Stockinger. 2019. The Intestine Harbors Functionally Distinct  
534 Homeostatic Tissue-Resident and Inflammatory Th17 Cells. *Immunity*  
535 Ouyang, W., J.K. Kolls, and Y. Zheng. 2008. The biological functions of T helper 17 cell effector  
536 cytokines in inflammation. *Immunity* 28:454-467.  
537 Park, S.L., A. Zaid, J.L. Hor, S.N. Christo, J.E. Prier, B. Davies, Y.O. Alexandre, J.L. Gregory, T.A. Russell,  
538 T. Gebhardt, F.R. Carbone, D.C. Tschärke, W.R. Heath, S.N. Mueller, and L.K. Mackay. 2018.  
539 Local proliferation maintains a stable pool of tissue-resident memory T cells after antiviral  
540 recall responses. *Nat Immunol* 19:183-191.  
541 Pedreira, C.E., E.S. Costa, Q. Leclercq, J.J. van Dongen, A. Orfao, and C. EuroFlow. 2013. Overview of  
542 clinical flow cytometry data analysis: recent advances and future challenges. *Trends*  
543 *Biotechnol* 31:415-425.



- 544 Pope, C., S.K. Kim, A. Marzo, D. Masopust, K. Williams, J. Jiang, H. Shen, and L. Lefrancois. 2001.  
545 Organ-specific regulation of the CD8 T cell response to *Listeria monocytogenes* infection. *J*  
546 *Immunol* 166:3402-3409.
- 547 Risnes, L.F., A. Christophersen, S. Dahal-Koirala, R.S. Neumann, G.K. Sandve, V.K. Sarna, K.E. Lundin,  
548 S.W. Qiao, and L.M. Sollid. 2018. Disease-driving CD4+ T cell clonotypes persist for decades in  
549 celiac disease. *J Clin Invest* 128:2642-2650.
- 550 Romagnoli, P.A., H.H. Fu, Z. Qiu, C. Khairallah, Q.M. Pham, L. Puddington, K.M. Khanna, L. Lefrancois,  
551 and B.S. Sheridan. 2017. Differentiation of distinct long-lived memory CD4 T cells in intestinal  
552 tissues after oral *Listeria monocytogenes* infection. *Mucosal Immunol* 10:520-530.
- 553 Ruiz, P., H. Takahashi, V. Delacruz, E. Island, G. Selvaggi, S. Nishida, J. Moon, L. Smith, T. Asaoka, D.  
554 Levi, A. Tekin, and A.G. Tzakis. 2010. International grading scheme for acute cellular rejection  
555 in small-bowel transplantation: single-center experience. *Transplant Proc* 42:47-53.
- 556 Sathaliyawala, T., M. Kubota, N. Yudanin, D. Turner, P. Camp, J.J. Thome, K.L. Bickham, H. Lerner, M.  
557 Goldstein, M. Sykes, T. Kato, and D.L. Farber. 2013. Distribution and compartmentalization of  
558 human circulating and tissue-resident memory T cell subsets. *Immunity* 38:187-197.
- 559 Schenkel, J.M., K.A. Fraser, V. Vezys, and D. Masopust. 2013. Sensing and alarm function of resident  
560 memory CD8(+) T cells. *Nat Immunol* 14:509-513.
- 561 Schon, M.P., A. Arya, E.A. Murphy, C.M. Adams, U.G. Strauch, W.W. Agace, J. Marsal, J.P. Donohue,  
562 H. Her, D.R. Beier, S. Olson, L. Lefrancois, M.B. Brenner, M.J. Grusby, and C.M. Parker. 1999.  
563 Mucosal T lymphocyte numbers are selectively reduced in integrin alpha E (CD103)-deficient  
564 mice. *J Immunol* 162:6641-6649.
- 565 Skon, C.N., J.Y. Lee, K.G. Anderson, D. Masopust, K.A. Hogquist, and S.C. Jameson. 2013.  
566 Transcriptional downregulation of S1pr1 is required for the establishment of resident  
567 memory CD8(+) T cells. *Nature Immunology* 14:1285-+.
- 568 Snyder, M.E., M.O. Finlayson, T.J. Connors, P. Dogra, T. Senda, E. Bush, D. Carpenter, C. Marboe, L.  
569 Benvenuto, L. Shah, H. Robbins, J.L. Hook, M. Sykes, F. D'Ovidio, M. Bacchetta, J.R. Sonett,  
570 D.J. Lederer, S. Arcasoy, P.A. Sims, and D.L. Farber. 2019. Generation and persistence of  
571 human tissue-resident memory T cells in lung transplantation. *Sci Immunol* 4:  
572 Szabo, P.A., M. Miron, and D.L. Farber. 2019. Location, location, location: Tissue resident memory T  
573 cells in mice and humans. *Sci Immunol* 4:
- 574 Teijaro, J.R., D. Turner, Q. Pham, E.J. Wherry, L. Lefrancois, and D.L. Farber. 2011. Cutting edge:  
575 Tissue-retentive lung memory CD4 T cells mediate optimal protection to respiratory virus  
576 infection. *J Immunol* 187:5510-5514.
- 577 Watanabe, R., A. Gehad, C. Yang, L.L. Scott, J.E. Teague, C. Schlapbach, C.P. Elco, V. Huang, T.R.  
578 Matos, T.S. Kupper, and R.A. Clark. 2015. Human skin is protected by four functionally and  
579 phenotypically discrete populations of resident and recirculating memory T cells. *Sci Transl*  
580 *Med* 7:279ra239.
- 581 Yang, J., M.S. Sundrud, J. Skepner, and T. Yamagata. 2014. Targeting Th17 cells in autoimmune  
582 diseases. *Trends Pharmacol Sci* 35:493-500.
- 583 Zhang, N., and M.J. Bevan. 2013. Transforming growth factor-beta signaling controls the formation  
584 and maintenance of gut-resident memory T cells by regulating migration and retention.  
585 *Immunity* 39:687-696.
- 586 Zuber, J., B. Shonts, S.P. Lau, A. Obradovic, J. Fu, S. Yang, M. Lambert, S. Coley, J. Weiner, J. Thome, S.  
587 DeWolf, D.L. Farber, Y. Shen, S. Caillat-Zucman, G. Bhagat, A. Griesemer, M. Martinez, T.  
588 Kato, and M. Sykes. 2016. Bidirectional intra-graft alloreactivity drives the repopulation of  
589 human intestinal allografts and correlates with clinical outcome. *Sci Immunol* 1:
- 590 Zundler, S., E. Becker, M. Spocinska, M. Slawik, L. Parga-Vidal, R. Stark, M. Wiendl, R. Atreya, T. Rath,  
591 M. Leppkes, K. Hildner, R. Lopez-Posadas, S. Lukassen, A.B. Ekici, C. Neufert, I. Atreya, K. van  
592 Gisbergen, and M.F. Neurath. 2019. Hobit- and Blimp-1-driven CD4(+) tissue-resident  
593 memory T cells control chronic intestinal inflammation. *Nat Immunol*

595 **Acknowledgments:**

596 We are grateful to the staff at the Endoscopy Unit and the surgical staff; Christian Naper,  
597 Institute of Immunology, for providing HLA typing; the Confocal Microscopy and Flow  
598 Cytometry Core Facilities; all at Oslo University Hospital, Rikshospitalet.

599

600 **Funding:**

601 This work was partly supported by the Research Council of Norway through its Centres of  
602 Excellence funding scheme (project number 179573/V40) and by grant from the South  
603 Eastern Norway Regional Health Authority (project number 2015002).

604 The authors declare no competing financial interests.

605

606 **Author contributions:**

607 R. Bartolomé-Casado, O.J.B. Landsverk, E.S. Bækkevold, and F.L. Jahnsen conceived the  
608 project. R. Bartolomé-Casado, O.J.B. Landsverk, and S.K. Chauhan processed samples,  
609 designed and performed experiments, and analyzed data. R. Bartolomé-Casado prepared  
610 figures. F. Sætre and K.Thorvaldsen Hagen assisted with experiments and data analysis. S.  
611 Yaqub and R. Horneland coordinated recruitment of patients and collection of biopsies. S.  
612 Yaqub, R. Horneland, O. Øyen, and E.M. Aandahl performed surgery and provided samples.  
613 L. Aabakken performed endoscopy and provided endoscopic biopsies. R. Bartolomé-Casado  
614 and F.L. Jahnsen wrote the manuscript. O.J.B. Landsverk, F. Sætre and E.S. Bækkevold  
615 contributed to writing the manuscript, E.S. Bækkevold, and F.L. Jahnsen supervised the  
616 study.

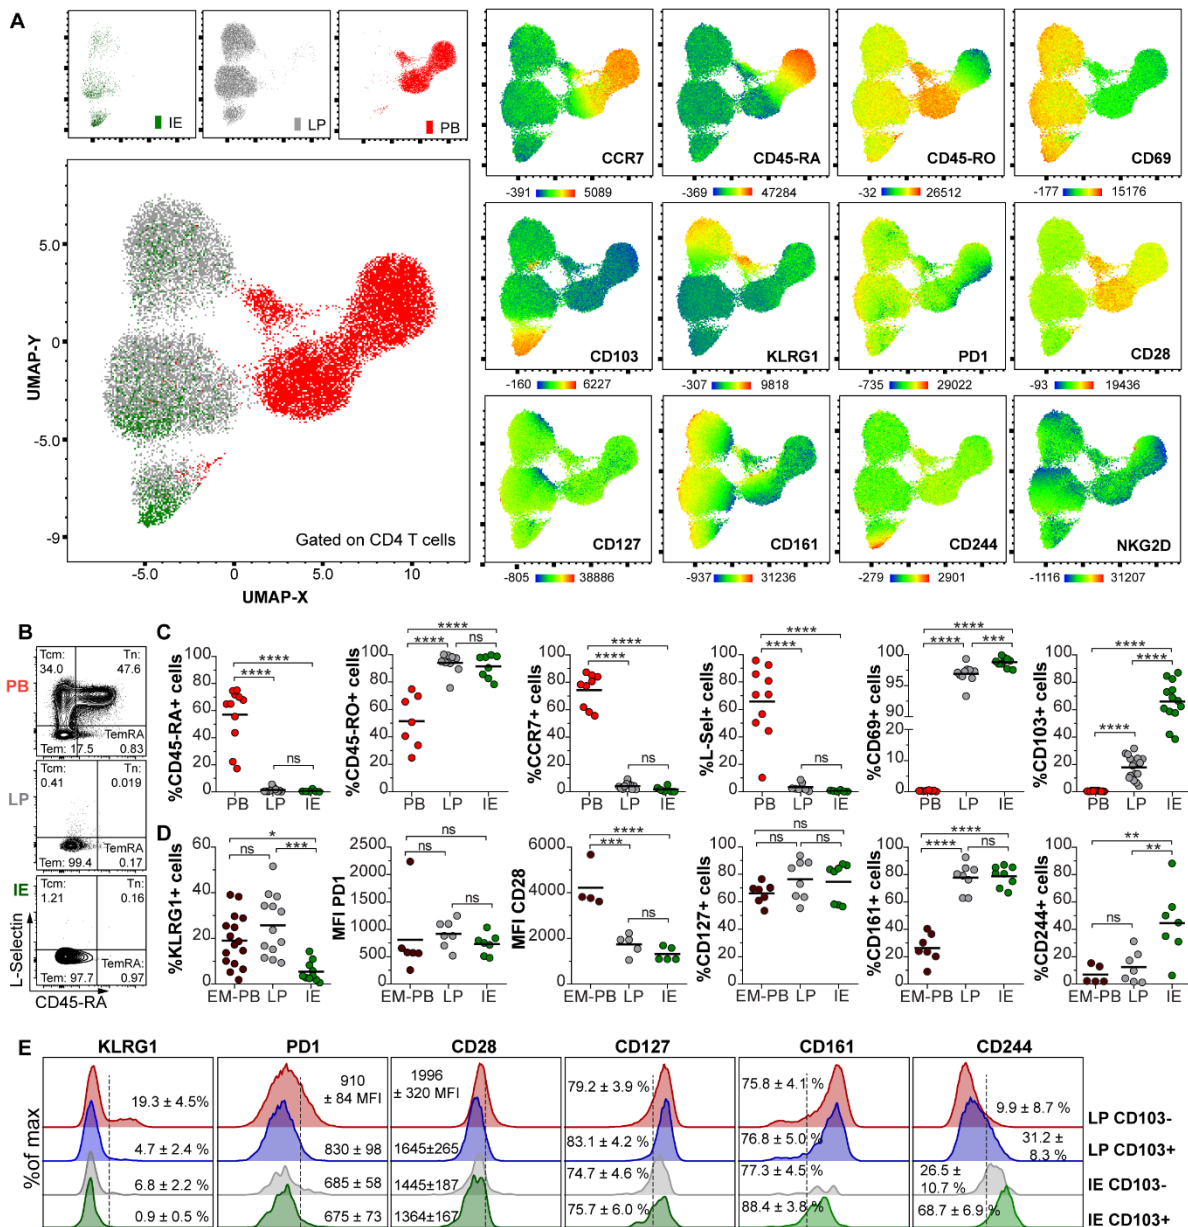

617  
 618 **Figure 1. Human intestinal CD4<sup>+</sup> T cells are phenotypically distinct from their circulating**  
 619 **counterparts. (A)** UMAP visualization after concatenation of flow-cytometric data from PB  
 620 (red), LP (gray), and IE (green) CD4<sup>+</sup> T cells, as described in (Bartolome-Casado et al., 2019).  
 621 Representative of three samples. Map of the clusters and representation of each tissue  
 622 compartment (left). Overlay of the UMAP clusters and the expression levels for each marker,  
 623 color-coded based on the median fluorescence intensity values (MFI) (right). **(B)**  
 624 Representative contour plots showing L-selectin and CD45RA expression on PB, LP and IE  
 625 CD4<sup>+</sup> T cells and classification of these cells into Tcm, central memory; Tem, effector  
 626 memory; TemRA, effector memory re-expressing CD45RA; Tn, naive. **(C)** Phenotypic  
 627 comparison of total PB CD4<sup>+</sup> T cells or **(D)** effector memory (EM) PB CD4<sup>+</sup> T cells with  
 628 intestinal LP, and IE CD4<sup>+</sup> T cells. Compiled data for each marker are given and black bars  
 629 indicate mean values. One-way ANOVA with Tukey's multiple comparisons test. ns, not  
 630 significant; \*, P ≤ 0.05; \*\*, P ≤ 0.01; \*\*\*, P ≤ 0.001; \*\*\*\*, P ≤ 0.0001. **(E)**. Representative  
 631 histograms showing the differential phenotypic profile of intestinal CD103<sup>-</sup> and CD103<sup>+</sup> CD4<sup>+</sup>

632 T cells from LP and IE for several  $T_{RM}$ -related markers. Mean values and SEM is provided.  
 633 Compiled data of all the experiments are shown in **Figure S1C**.  
 634

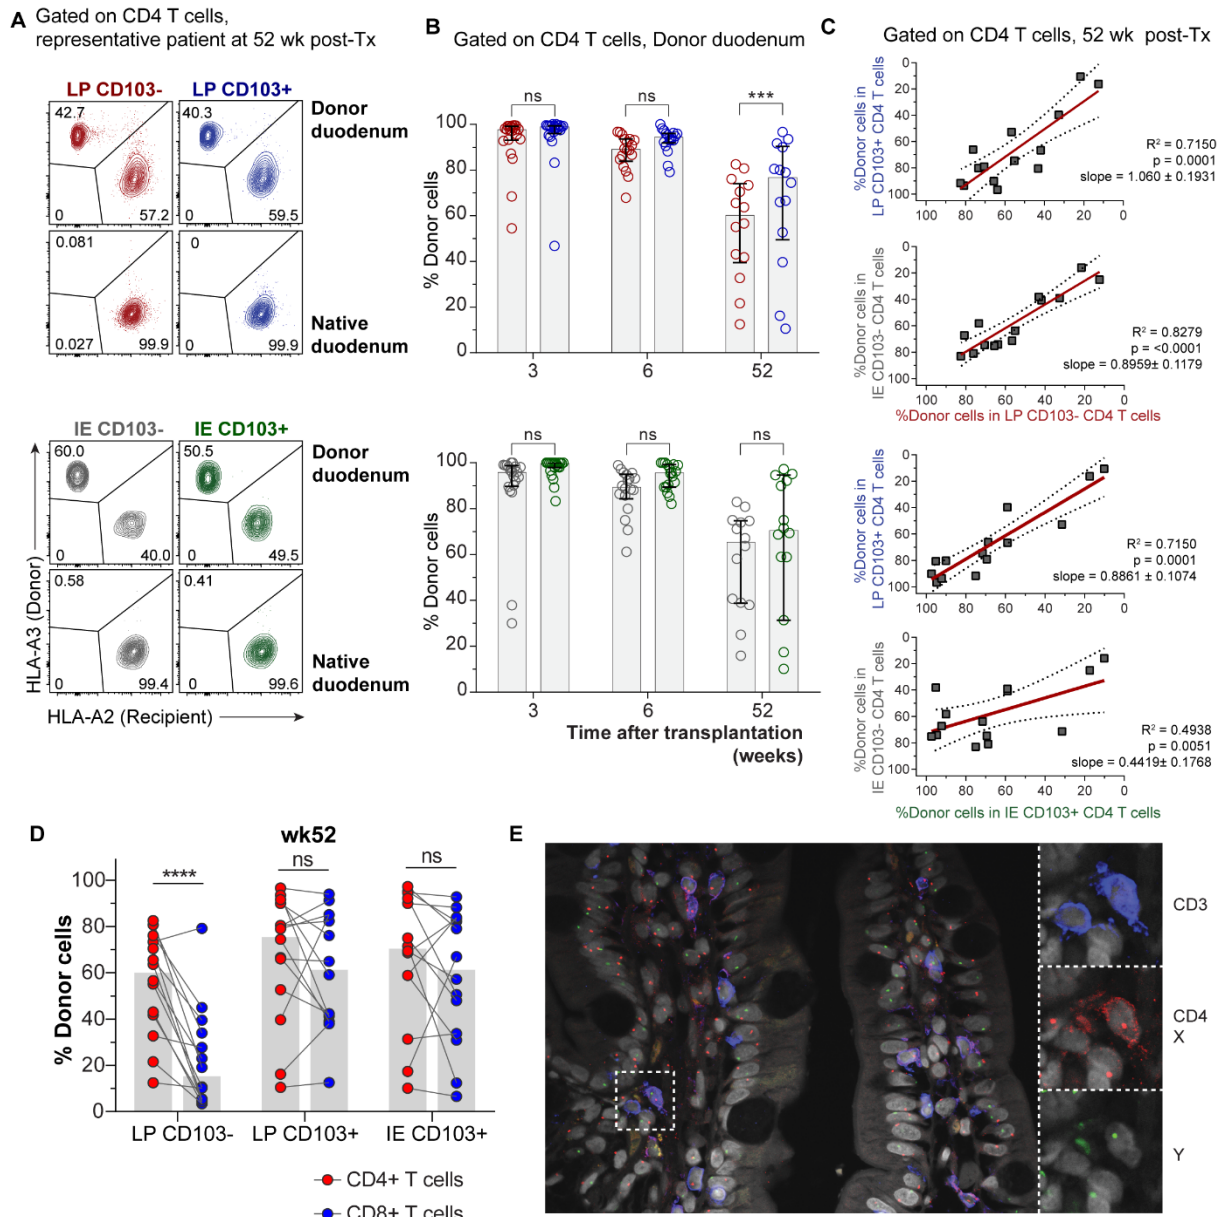

635  
 636 **Figure 2. CD4<sup>+</sup>  $T_{RM}$  cells persist for >1 yr in the transplanted SI**  
 637 **(A)** Representative contour plots at 52 wk after Tx and **(B)** compile data for the fractions of  
 638 donor-derived CD4<sup>+</sup> T cells in LP CD103<sup>-</sup> (red) and CD103<sup>+</sup> (blue) compartments as well as IE  
 639 CD103<sup>-</sup> (grey) and CD103<sup>+</sup> (green) at 3 (n = 20), 6 (n = 18), and 52 wk after Tx (n = 14)  
 640 determined by HLA class I expression (as in A). Gray columns indicate median values.  
 641 Statistical analysis was performed using two-way ANOVA for repeated measures (RM) with  
 642 Tukey's multiple comparisons test. ns, not significant; \*\*\*, P ≤ 0.001; **(C)** Pearson correlation  
 643 of the percentages of donor-derived cells in the above mentioned LP and IE CD4<sup>+</sup> T cell  
 644 subsets 1-yr after Tx. Statistics performed using two-tailed P value (95% confidence interval,  
 645 n = 14). **(D)** Frequencies of persisting donor cells in different subsets of CD4<sup>+</sup> and CD8<sup>+</sup> T cells  
 646 from the same biopsies of donor duodenum at 52 weeks (wk) post-Tx. Data for CD8<sup>+</sup> T cells

647 has been previously published (Bartolome-Casado et al., 2019). Grey bars indicate median  
 648 values. RM two-way ANOVA. \*\*\*\*,  $P \leq 0.0001$ ; ns, non-significant. **(E)** Representative  
 649 confocal image of biopsies obtained from donor duodenum (male) of a female patient at one  
 650 year post-transplantation. Tissue sections were stained with X/Y chromosome fluorescent in  
 651 situ hybridization probes (Y, green; X, red) and antibodies against CD4 (red) and CD3 (blue).  
 652 Hoechst (gray) stains individual nuclei. Scale bars, 50 $\mu$ m and 10 $\mu$ m, respectively.  
 653  
 654  
 655

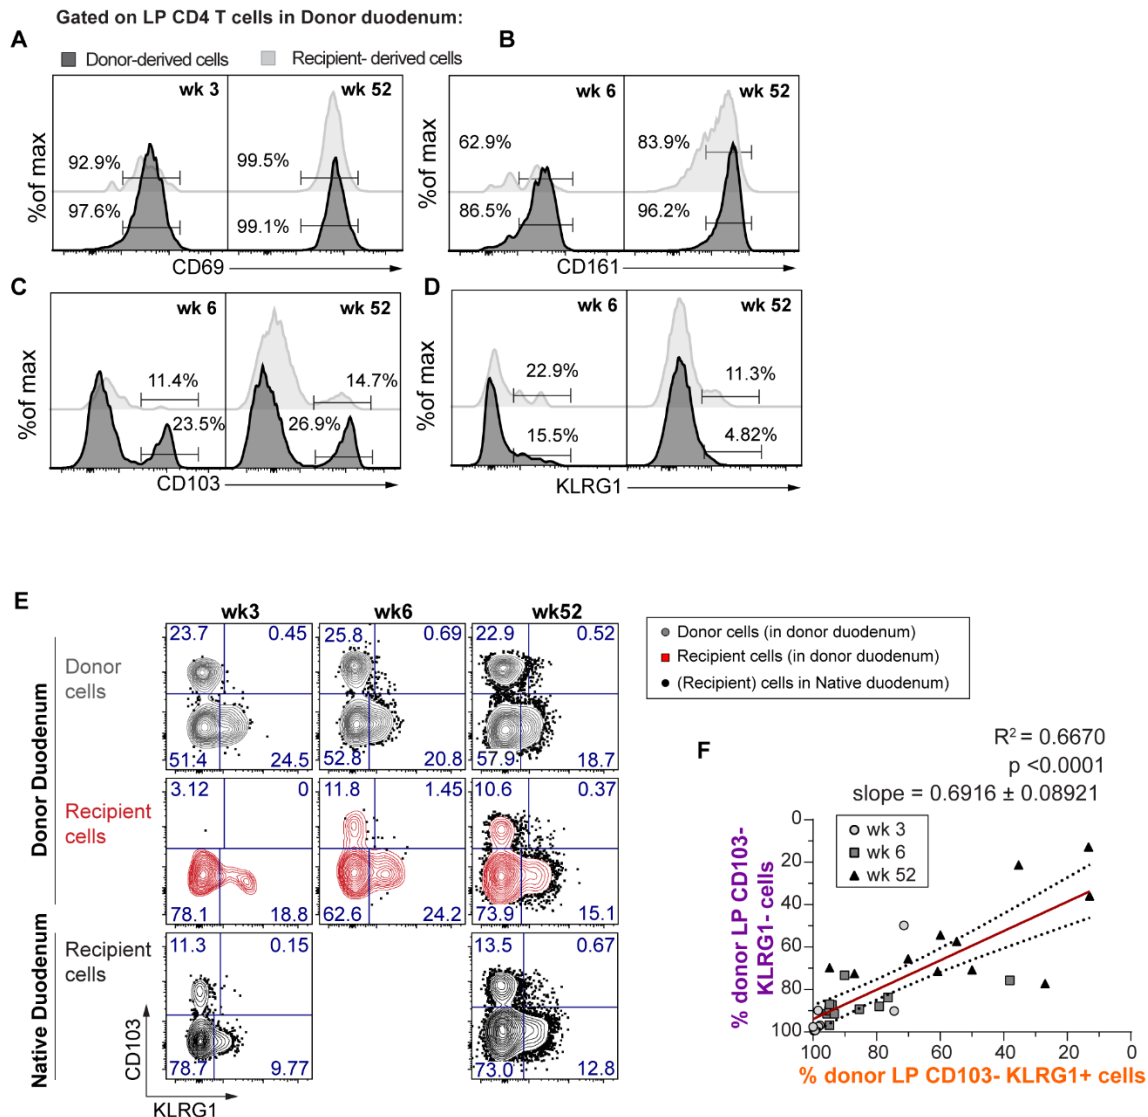

656  
 657 **Figure 3. Incoming recipient CD4<sup>+</sup> T cells undergo gradual phenotypic changes over time in**  
 658 **transplanted duodenum (A-D)** Representative flow-cytometric analysis for the expression of  
 659 different T<sub>RM</sub> associated markers on donor-derived (black) and recipient- derived (light grey)  
 660 LP CD4<sup>+</sup> T cells from donor duodenum at the indicated weeks (wk) post-Tx. **(E)** Distribution of  
 661 donor (grey) and recipient-derived (red) LP CD4<sup>+</sup> T cells isolated from donor duodenum  
 662 (above) and native duodenum (below, black) according to the expression of CD103 and  
 663 KLRG1 at the indicated time-points after-Tx. **(F)** Pearson correlation of the percentages of  
 664 donor-derived cells in LP CD103<sup>-</sup> KLRG1<sup>+</sup> and KLRG1<sup>-</sup> CD4<sup>+</sup> T cell subsets over time after Tx.  
 665 Statistics performed using two-tailed P value (95% confidence interval, n = 32).

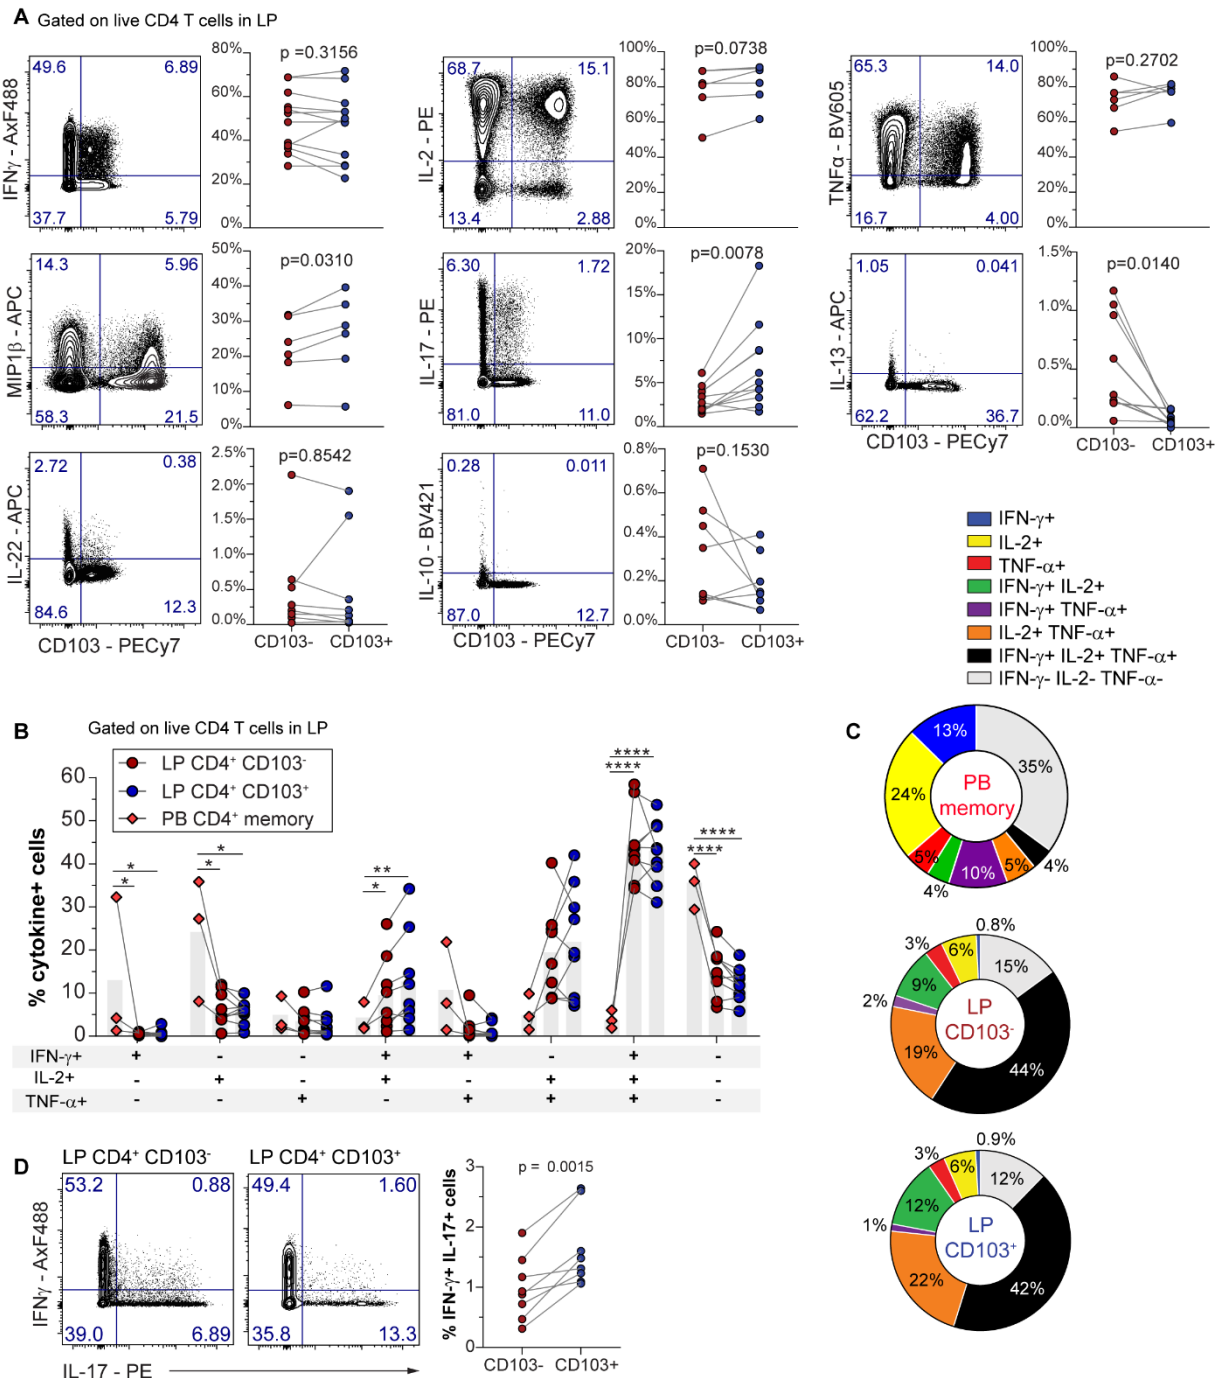

666  
667  
668  
669  
670  
671  
672  
673  
674  
675  
676  
677

**Figure 4. The majority of SI CD4<sup>+</sup> T cells exhibits a polyfunctional T<sub>H</sub>1 profile**

**(A)** Representative contour plots (left) and compiled data (right) showing PMA/ionomycin induced cytokine production by CD103<sup>-</sup> compared to CD103<sup>+</sup> LP CD4<sup>+</sup> T cells. P values of paired t-test are displayed. **(B)** IFN- $\gamma$ , IL-2 and TNF- $\alpha$  production by PB T<sub>EM</sub> CD4<sup>+</sup> T cells and intestinal LP CD103<sup>-</sup>, LP CD103<sup>+</sup> CD4<sup>+</sup> T cells. The bars indicate mean values. Statistics performed using one-way ANOVA for each combination of cytokines. **(C)** Relative fractions of each cytokine combination indicated in **(B)** by PB T<sub>EM</sub> CD4<sup>+</sup> T cells (n=3), and intestinal LP CD103<sup>-</sup> (n=6) and LP CD103<sup>+</sup> (n=6). CD4<sup>+</sup> T cells represented on pie charts with color codes. Mean values of indicated experiments. **(D)** Representative contour plots (left) and compiled data (right) showing simultaneous IFN- $\gamma$  and IL17 expression by LP CD103<sup>-</sup> and CD103<sup>+</sup> CD4<sup>+</sup> T cells. Paired t-test.

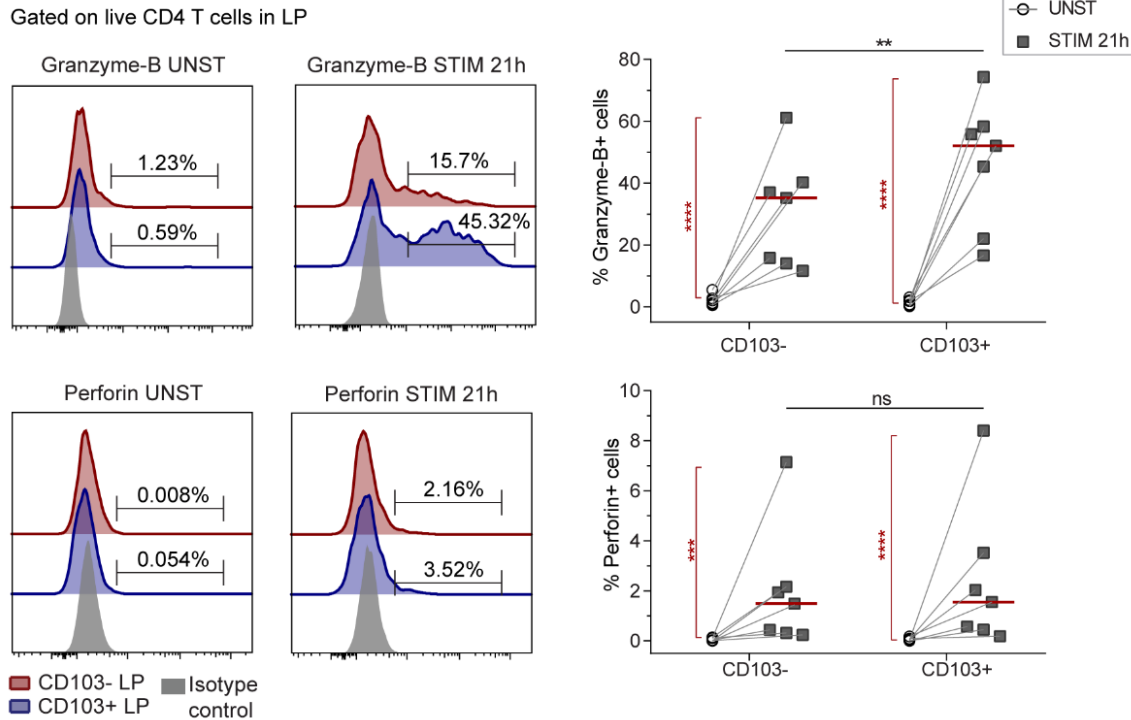

678

679 **Figure 5. LP CD4<sup>+</sup> T cells produce cytotoxic granules after stimulation**

680 Representative flow-cytometric histogram (left) and compiled data (right) for the  
 681 intracellular expression of granzyme-B and perforin in LP CD103<sup>-</sup> and CD103<sup>+</sup> CD4<sup>+</sup> T cell  
 682 subsets without (UNST) and after (STIM) stimulation with anti-CD3/CD28 beads for 21 h. Red  
 683 lines indicate median values. Student's t test was applied to compare the expression of  
 684 cytotoxic mediators by both subsets (black horizontal lines), and by unstimulated *versus* 21h  
 685 stimulated cells (red vertical lines and asterisks). \*\*, P ≤ 0.01; ns, not-significant.

686

687

688 **Supplementary Materials**

689 **Table 1.** Antibodies used in the study.

690 **Figure S1.** Extended phenotype of SI CD4<sup>+</sup> T cells, accompanies Figure 1.

691 **Figure S2.** Turnover of CD4<sup>+</sup> T cells in transplanted duodenum, accompanies Figure 2.

692 **Figure S3.** Absence of cross-contamination between donor and native (recipient) duodenum.

693 **Figure S4.** Comparative of the functional capabilities of LP CD103<sup>-</sup> KLRG1<sup>-</sup> and KLRG1<sup>+</sup> CD4<sup>+</sup> T  
 694 cell subsets.

695

696 **Table 1:** Antibodies used in the study.

| Target         | Clone     | Fluorophore    | Company          | Reference      | Pheno-T <sub>RM</sub> | PTx panel | Sorting | Ki67 | Cyto-tox | Cytokines | X/Y FISH |
|----------------|-----------|----------------|------------------|----------------|-----------------------|-----------|---------|------|----------|-----------|----------|
| CD3            | OKT_3     | BV650          | Biolegend        | 317324         | x                     | x         |         | x    |          |           |          |
| CD3            | OKT_3     | APC-eF780      | eBioscience      | 47-0037-42     |                       |           | x       |      |          | x         |          |
| CD3            | OKT_3     | BV510          | Biolegend        | 317332         |                       |           |         |      |          | x         |          |
| CD3            | OKT_3     | APC            | Biolegend        | 317318         |                       |           | x       |      |          |           |          |
| CD3            | OKT_3     | PerCP-Cy5.5    | Biolegend        | 317336         |                       |           |         | x    |          |           |          |
| CD3            | Poly      | unconj         | Dako             | A0452          |                       |           |         |      |          |           | x        |
| CD4            | OKT_4     | eF450          | eBioscience      | 48-0048-42     | x                     | x         |         | x    |          | x         |          |
| CD4            | OKT_4     | PerCP-Cy5.5    | Biolegend        | 317428         |                       |           | x       |      |          |           |          |
| CD4            | 1F6       | unconj         | Leica Biosystems | NCL-L-CD4-1F6  |                       |           |         |      |          |           | x        |
| CD8            | SK1       | Alexa-Fluor488 | Biolegend        | 344716         | x                     | x         |         |      |          |           |          |
| CD8            | SK1       | APC-eF780      | eBiosciences     | 47-0087-42     |                       |           | x       |      | x        | x         |          |
| CD8            | SK1       | PerCP Cy5.5    | Biolegend        | 344710         | x                     |           |         |      |          | x         |          |
| CD8            | SK1       | PE             | BDB              | 340046         |                       |           |         | x    |          |           |          |
| CD8            | 4B11      | unconj         | Novocastra       | NCL-L-CD8-4B11 |                       |           |         |      |          |           | x        |
| CD8b /NHP      | SIDI8BEE  | eF660          | eBioscience      | 50-5273-41     | x                     | x         |         |      |          |           |          |
| CD28           | CD28.2    | BV605          | BD Horizon       | 562976         | x                     | x         |         |      |          |           |          |
| CD28           | CD28.2    | APC            | Biolegend        | 302912         | x                     | x         |         |      |          |           |          |
| CD28           | CD28.2    | PE             | Biolegend        | 302908         | x                     | x         |         |      |          |           |          |
| CD45           | HI30      | BV510          | Biolegend        | 304036         |                       |           | x       | x    | x        |           |          |
| CD45           | HI30      | Ax700          | Biolegend        | 304024         | x                     |           |         |      |          |           |          |
| CD45           | 2D1       | APC-H7         | BDB              | 560178         | x                     | x         |         |      |          |           | x        |
| CD45-RA        | HI100     | APC-eF780      | eBiosciences     | 47-0458-42     | x                     |           |         |      |          |           | x        |
| CD45-RA        | HI100     | PE-Cy7         | eBiosciences     | 25-0458-42     |                       |           | x       |      |          |           | x        |
| CD45-RO        | UCHL1     | APC            | eBiosciences     | 17-0457-42     | x                     |           |         |      |          |           |          |
| CD62-L         | SK11      | FITC           | BD Pharmingen    | 347443         | x                     |           |         |      |          |           |          |
| CD69           | FN50      | APC            | Biolegend        | 310910         | x                     |           |         |      |          |           |          |
| CD103          | B-Ly7     | PE-Cy7         | Biolegend        | 350212         | x                     | x         | x       | x    | x        |           |          |
| CD103          | Ber-ACT8  | BV605          | Biolegend        | 350218         |                       |           |         |      |          |           | x        |
| CD103          | Ber-ACT8  | PE-Cy7         | Biolegend        | 350212         |                       |           |         |      |          |           | x        |
| CD103          | B-Ly7     | FITC           | eBioscience      | 11-1038-42     | x                     |           |         |      |          |           | x        |
| CD127 (IL7-R)  | Hil7r-m21 | PE             | BD-Pharm         | 561028         | x                     | x         |         |      |          |           | x        |
| CD127 (IL7-R)  | Hil7r-m21 | BV605          | BD-Horizon       | 562662         | x                     | x         |         |      |          |           |          |
| CD161 (KLRB1)  | HP-3G10   | BV605          | Biolegend        | 339915         | x                     | x         |         |      |          |           |          |
| CD244 (SLAMF4) | 2B4       | APC            | Biolegend        | 329511         | x                     | x         |         |      |          |           |          |
| CCR7 (CD197)   | G043H7    | PE             | Biolegend        | 353203         | x                     |           |         |      |          |           |          |
| CCR7 (CD197)   | G043H7    | PE-dazzle594   | Biolegend        | 353235         | x                     |           |         |      |          |           |          |



| Target                   | Clone        | Fluorophore | Company                       | Reference   | Pheno-T <sub>RM</sub> | PTx panel | Sorting | Ki67 | Cyto-tox | Cytokines | X/Y FISH |
|--------------------------|--------------|-------------|-------------------------------|-------------|-----------------------|-----------|---------|------|----------|-----------|----------|
| PD-1 (CD279)             | EH12.1       | BV605       | BD-Horizon                    | 563245      | x                     | x         |         |      |          |           |          |
| KLRG1                    | 13F12F2      | APC         | eBiosciences                  | 17-9488-42  | x                     | x         | x       | x    | x        | x         |          |
| KLRG1                    | 13F12F2      | PE          | eBiosciences                  | 12-9488-42  | x                     | x         | x       |      | x        |           |          |
| NKG2D                    | 1D11         | PE          | Biologend                     | 320805      | x                     | x         |         |      |          |           |          |
| NKG2D                    | 1D11         | BV605       | BDB                           | 743559      | x                     | x         |         |      |          |           |          |
| TCR-gd                   | 5A6.E9       | PE          | Molecular Probes™, Invitrogen | MHGD04      | x                     | x         | x       |      |          |           |          |
| TCR-gd                   | 5A6.E9       | FITC        | Molecular Probes™, Invitrogen | MHGD01      |                       | x         | x       |      |          |           |          |
| Anti-Human Epithelial Ag | Ber-EP4      | FITC        | Dako                          | F0860       |                       |           | x       |      |          |           |          |
| HLA-A2                   | BB 7.2       | PE          | Abcam                         | ab79523     |                       | x         |         |      |          |           |          |
| HLA-A3                   | GAP.A3       | FITC        | eBioscience                   | 11-5754-42  |                       | x         |         |      |          |           |          |
| HLA-A3                   | GAP.A3       | APC         | eBioscience                   | 17-5754-42  |                       | x         | x       |      |          |           |          |
| HLA-B7                   | BB7.1        | PE          | Millipore                     | MAB1288     |                       | x         |         |      |          |           |          |
| HLA-B8                   | REA145       | PE          | Miltenyi Biotech              | 130-118-960 |                       | x         | x       |      |          |           |          |
| Granzyme-B               | CLB-GB11     | PE          | SANQUIN (Dianova AS)          | M2289       |                       |           |         |      | x        |           |          |
| Perforin                 | gG9          | FITC        | BD-Pharm                      | 556577      |                       |           |         |      | x        |           |          |
| TNF-alpha                | MAB11        | BV605       | Biologend                     | 502936      |                       |           |         |      |          | x         |          |
| IFNg                     | 4S.B3        | Ax488       | Biologend                     | 502517      |                       |           |         |      |          | x         |          |
| IL-2                     | MQ1-17H12    | PE          | Biologend                     | 500306      |                       |           |         |      |          | x         |          |
| IL-10                    | JES3-9D7     | BV421       | BD-Horizon                    | 564053      |                       |           |         |      |          | x         |          |
| IL-13                    | JES10-5A2    | APC         | Biologend                     | 501907      |                       |           |         |      |          | x         |          |
| IL-17                    | eBio64DEC 17 | PE          | eBioscience                   | 12-7179-41  |                       |           |         |      |          | x         |          |
| IL-22                    | 22URTI       | eF660       | eBioscience                   | 50-7229-41  |                       |           |         |      |          | x         |          |
| MIP1beta (CCL4)          | FL3423L      | APC         | eBioscience                   | 17-7540-41  |                       |           |         |      |          | x         |          |
| Ki67                     | B56          | Ax488       | BD-Pharm                      | 558616      |                       |           |         | x    |          |           |          |
| Isotype mouse IgG1       | MOPC-21      | Ax488       | BD-Pharm                      | 555909      |                       |           |         | x    | x        |           |          |
| Isotype mouse IgG2b      | 27-35        | FITC        | BD-Pharm                      | 556577      |                       |           |         |      | x        |           |          |
| Isotype mouse IgG1       | MOPC-31C     | PE          | BD-Pharm                      | 550617      |                       |           |         |      | x        |           |          |
| Mouse IgG1               | Polyclonal   | Alexa 555   | Molecular Probes™, Invitrogen | A-21147     |                       |           |         |      |          |           | x        |
| Rabbit IgG (H+L)         | Polyclonal   | Alexa 647   | Molecular Probes™, Invitrogen | A-31573     |                       |           |         |      |          |           | x        |

697 APC, allophycocyanin; Ax, Alexa Fluor; BV, brilliant violet; Cy7, cyanin7; eF, eFluor; FISH, fluorescence in situ hybridization;  
 698 FITC, fluorescein isothiocyanate; H7, hilite7; PerCP-Cy5.5, peridinin-chlorophyll-protein cyanin5.5; unconj, unconjugated.

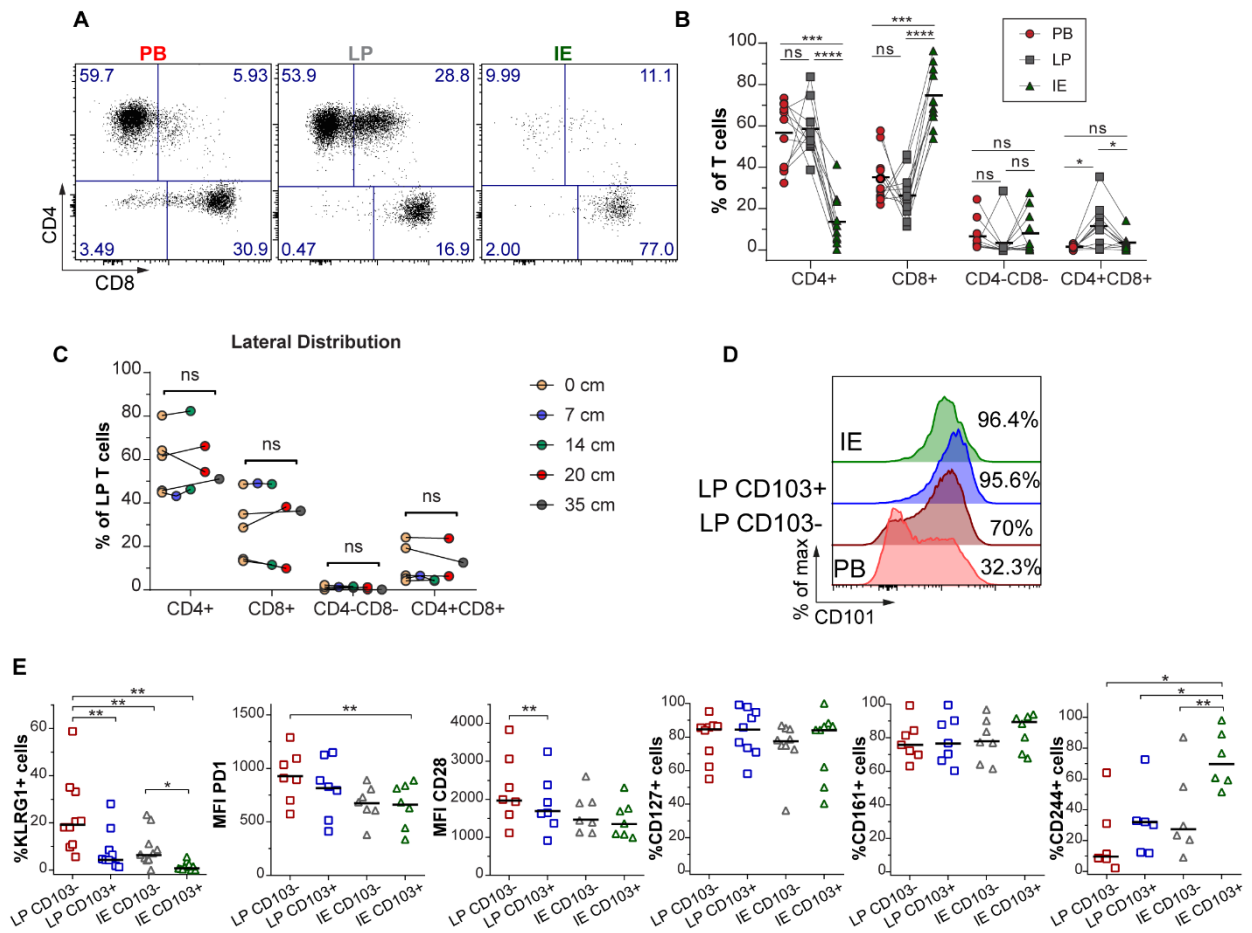

699

700 **Figure S1. Extended phenotype of SI CD4<sup>+</sup> T cells, accompanies Figure 1.**

701 **(A)** Representative flow-cytometric dot-plot and **(B)** aggregated data for the distribution of T  
 702 cell subsets in PB, LP, and IE fractions collected from the same patient. Black lines indicate  
 703 mean value. Statistics performed using two-way ANOVA, repeated measures matching both  
 704 factors, and Tukey's multiple comparison test. ns, not significant; \*, P ≤ 0.05; \*\*\*, P ≤ 0.001;  
 705 \*\*\*\*, P ≤ 0.0001. **(C)** Lengthwise representation of the CD4<sup>+</sup> subsets in LP determined by  
 706 flow cytometric analysis of biopsies taken at intervals along resected duodenum-proximal  
 707 jejunum from individual subjects after Whipple procedure. n = 5; paired Student's t test  
 708 comparing 0 cm to the farthest distance. ns, not significant. **(D)** Representative histogram  
 709 showing the expression of CD101 on PB, CD103<sup>-</sup> and CD103<sup>+</sup> LP and IE CD4<sup>+</sup> T cells. **(E)**  
 710 Percentage of positive cells or MFI values for various markers on intestinal-derived CD103<sup>-</sup>  
 711 and CD103<sup>+</sup> CD4<sup>+</sup> T cells from LP and IE. Black bars indicate median values. Statistical analysis  
 712 was performed using repeated-measures one-way ANOVA with Tukey's multiple  
 713 comparisons test. \*, P ≤ 0.05; \*\*, P ≤ 0.01; all other comparisons are not significant.

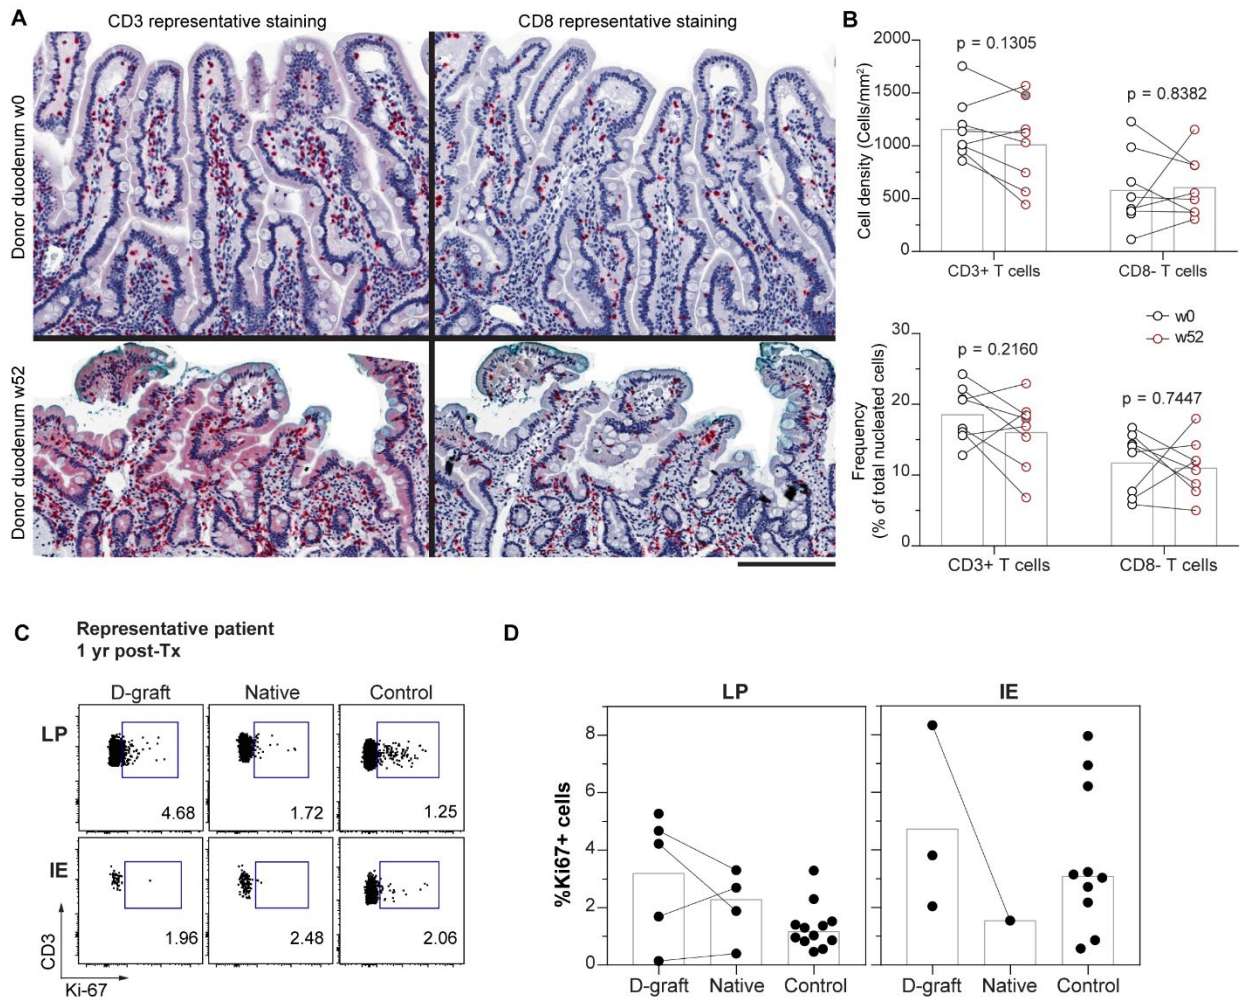

714  
715

716 **Figure S2. Turnover of CD4<sup>+</sup> T cells in transplanted duodenum, accompanies Figure 2.**  
 717 **(A)** Representative immunohistochemistry staining of CD3<sup>+</sup> cells (left) and CD8<sup>+</sup> T cells (right)  
 718 on tissue sections from donor duodenum at baseline (w0) and 1-yr after Tx (w52). Scale bar,  
 719 200 $\mu$ m. **(B)** Compile data of CD3<sup>+</sup> and CD8<sup>+</sup> T cell counts on tissue sections from donor  
 720 duodenum of representative patients (n=8) at baseline (w0, black) and 1-yr after Tx (w52,  
 721 red). Paired t-test. **(C)** Representative dot plot showing Ki67 expression in donor- or  
 722 recipient-derived CD4<sup>+</sup> T cells in LP and epithelium (IE) isolated from biopsies of donor or  
 723 native duodenum 1-yr after Tx and control intestinal resections. **(D)** Compiled data for the  
 724 percentages of Ki67-positive cells in donor- or recipient-derived CD4<sup>+</sup> T cells in LP and IE at  
 725 different time points after Tx in donor or native duodenum and in control intestinal  
 726 resections.

**Fig. S3**

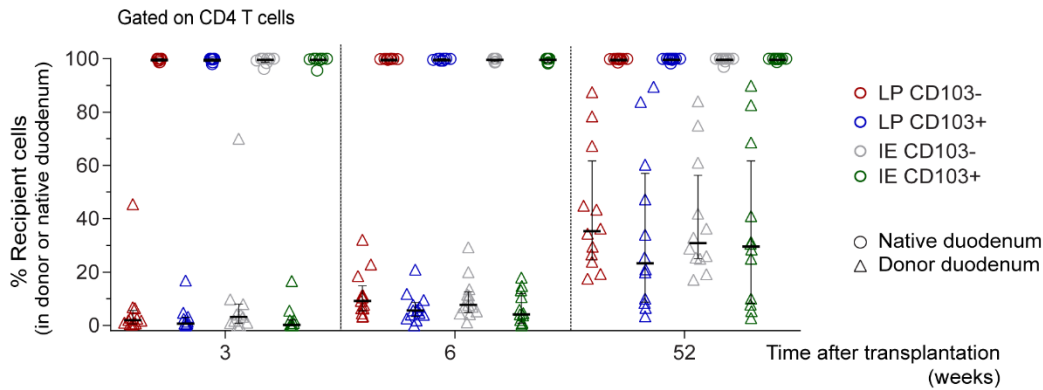

727

728 **Figure S3. Absence of cross-contamination between donor and native (recipient)**  
 729 **duodenum.** Frequencies of recipient cells within each CD4<sup>+</sup> T-cell subset in biopsies from  
 730 donor and recipient (native) duodenum of the same patients at different time points after  
 731 Tx. Black horizontal lines represent median values, and error bars show interquartile ranges.

732

733

734

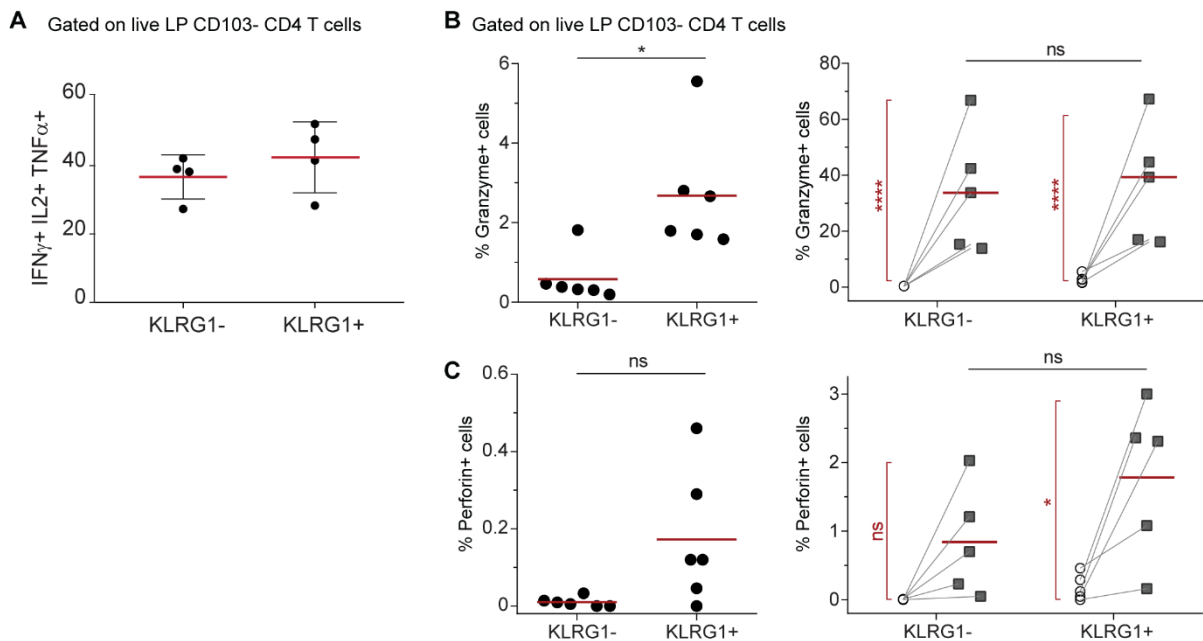

735

736 **Figure S4. Comparative of the functional capabilities of LP CD103<sup>-</sup> KLRG1<sup>-</sup> and KLRG1<sup>+</sup> CD4<sup>+</sup>**  
 737 **T cell subsets. (A)** Frequency of polyfunctional (IL-2<sup>+</sup>, IFN-γ<sup>+</sup> and TNF-α<sup>+</sup>) cells within LP  
 738 CD103<sup>-</sup> KLRG1<sup>-</sup> and KLRG1<sup>+</sup> subsets (n =4). **(B)** Frequencies of granzyme-B and **(C)** perforin  
 739 positive cells in unstimulated samples (left) and after 21 h of activation with anti-CD3 beads  
 740 (right) for the two subsets (KLRG1<sup>+</sup>, KLRG1<sup>-</sup>) of CD103<sup>-</sup> CD4<sup>+</sup> T cells in LP. Paired student's t  
 741 test was applied to compare the two subsets. ns, not significant; \*\*, P ≤ 0.01.

742
